# Supplementary material for: Evaluation of oxygen-containing pentadentate ligands with pyridine/quinoline/isoquinoline binding sites via the structural and electrochemical properties of mononuclear copper(ii) complexes
Source: Royal Society of Chemistry journal article supplement (doi:10.1039/d3dt02814c), 2023-01-01
Supplement: d3dt02814c1.pdf [file d3dt02814c1.pdf]

Supplementary Information for  
**Evaluation of oxygen-containing pentadentate ligands with  
pyridine/quinoline/isoquinoline binding sites *via* structural and electrochemical  
properties of mononuclear copper(II) complex†**

Yuji Mikata,<sup>a,b,c,d,\*</sup> Mizuho Uchida,<sup>c</sup> Hinata Koike,<sup>d</sup> Sunao Shoji,<sup>a,d</sup> Yutaka Ohsedo,<sup>a,d</sup>  
Yasushi Kawai<sup>e</sup> and Takashi Matsuo<sup>f</sup>

<sup>a</sup>*Laboratory for Molecular & Functional Design, Department of Engineering, Nara Women's  
University, Nara 630-8506, Japan*

<sup>b</sup>*KYOUSEI Science Center, Nara Women's University, Nara 630-8506, Japan*

<sup>c</sup>*Department of Chemistry, Biology, and Environmental Science, Faculty of Science, Nara  
Women's University, Nara 630-8506, Japan*

<sup>d</sup>*Cooperative Major in Human Centered Engineering, Nara Women's University, Nara 630-  
8506, Japan*

<sup>e</sup>*Nagahama Institute of Bio-Science & Technology, Nagahama, Shiga 526-0829, Japan*

<sup>f</sup>*Division of Materials Science, Graduate School of Science and Technology, Nara Institute of  
Science and Technology (NAIST), Takayama, Ikoma, Nara 630-0192, Japan*

## INDEX

|                                                                                                                                                                                                                                                                              |         |
|------------------------------------------------------------------------------------------------------------------------------------------------------------------------------------------------------------------------------------------------------------------------------|---------|
| <i>Preparation of copper(II) complexes</i> .....                                                                                                                                                                                                                             | S4-S9   |
| <i>X-ray crystallography</i> .....                                                                                                                                                                                                                                           | S10-S12 |
| <b>Table S1.</b> Crystallographic data for [Cu( <b>PQP</b> )(ClO <sub>4</sub> )]ClO <sub>4</sub> ( <b>PQP-Cu</b> ) and [Cu( <b>PQQ</b> )](ClO <sub>4</sub> ) <sub>2</sub> ( <b>PQQ-Cu</b> )                                                                                  |         |
| <b>Table S2.</b> Crystallographic data for [Cu( <b>PIP</b> )(ClO <sub>4</sub> )]ClO <sub>4</sub> ·CH <sub>3</sub> CN ( <b>PIP-Cu</b> ·CH <sub>3</sub> CN) and [Cu( <b>III</b> )(ClO <sub>4</sub> )]ClO <sub>4</sub> ·CH <sub>3</sub> CN ( <b>III-Cu</b> ·CH <sub>3</sub> CN) |         |
| <b>Table S3.</b> Selected Bond Angles (°) for <b>PPP-Cu</b> , <b>PPQ-Cu</b> , <b>PQP-Cu</b> , <b>PQQ-Cu</b> , <b>PIP-Cu</b> and <b>III-Cu</b>                                                                                                                                |         |
| <i>Cyclic voltammetry</i> .....                                                                                                                                                                                                                                              | S13-S14 |
| <b>Fig. S1.</b> Cyclic voltammogram of copper(II) complexes in acetonitrile.                                                                                                                                                                                                 |         |
| <i>Absorption spectrum</i> .....                                                                                                                                                                                                                                             | S15-S16 |
| <b>Fig. S2.</b> Absorption spectrum of copper(II) complexes in methanol.                                                                                                                                                                                                     |         |
| <i><sup>1</sup>H/<sup>13</sup>C NMR spectrum</i> .....                                                                                                                                                                                                                       | S17-S37 |
| <b>Fig. S3.</b> <sup>1</sup> H/ <sup>13</sup> C NMR spectrum of <b>PPI</b> in CDCl <sub>3</sub> .                                                                                                                                                                            |         |
| <b>Fig. S4.</b> <sup>1</sup> H NMR spectrum of 2-((2-pyridylmethyl)(2-quinolylmethyl)-amino)ethanol in CDCl <sub>3</sub> .                                                                                                                                                   |         |
| <b>Fig. S5.</b> <sup>1</sup> H/ <sup>13</sup> C NMR spectrum of <b>PQP</b> in CDCl <sub>3</sub> .                                                                                                                                                                            |         |
| <b>Fig. S6.</b> <sup>1</sup> H/ <sup>13</sup> C NMR spectrum of <b>PQQ</b> in CDCl <sub>3</sub> .                                                                                                                                                                            |         |
| <b>Fig. S7.</b> <sup>1</sup> H/ <sup>13</sup> C NMR spectrum of <b>PQI</b> in CDCl <sub>3</sub> .                                                                                                                                                                            |         |
| <b>Fig. S8.</b> <sup>1</sup> H NMR spectrum of 2-((2-pyridylmethyl)(1-isoquinolylmethyl)-amino)ethanol in CDCl <sub>3</sub> .                                                                                                                                                |         |
| <b>Fig. S9.</b> <sup>1</sup> H/ <sup>13</sup> C NMR spectrum of <b>PIP</b> in CDCl <sub>3</sub> .                                                                                                                                                                            |         |
| <b>Fig. S10.</b> <sup>1</sup> H/ <sup>13</sup> C NMR spectrum of <b>PIQ</b> in CDCl <sub>3</sub> .                                                                                                                                                                           |         |
| <b>Fig. S11.</b> <sup>1</sup> H/ <sup>13</sup> C NMR spectrum of <b>PII</b> in CDCl <sub>3</sub> .                                                                                                                                                                           |         |
| <b>Fig. S12.</b> <sup>1</sup> H/ <sup>13</sup> C NMR spectrum of <b>QQP</b> in CDCl <sub>3</sub> .                                                                                                                                                                           |         |
| <b>Fig. S13.</b> <sup>1</sup> H/ <sup>13</sup> C NMR spectrum of <b>QQQ</b> in CDCl <sub>3</sub> .                                                                                                                                                                           |         |
| <b>Fig. S14.</b> <sup>1</sup> H/ <sup>13</sup> C NMR spectrum of <b>QQI</b> in CDCl <sub>3</sub> .                                                                                                                                                                           |         |
| <b>Fig. S15.</b> <sup>1</sup> H NMR spectrum of 2-((1-isoquinolylmethyl)amino)ethanol in CDCl <sub>3</sub> .                                                                                                                                                                 |         |
| <b>Fig. S16.</b> <sup>1</sup> H NMR spectrum of 2-((2-quinolylmethyl)(1-isoquinolylmethyl)-amino)ethanol in CDCl <sub>3</sub> .                                                                                                                                              |         |
| <b>Fig. S17.</b> <sup>1</sup> H/ <sup>13</sup> C NMR spectrum of <b>QIP</b> in CDCl <sub>3</sub> .                                                                                                                                                                           |         |

- Fig. S18.**  $^1\text{H}/^{13}\text{C}$  NMR spectrum of **QIQ** in  $\text{CDCl}_3$ .  
**Fig. S19.**  $^1\text{H}/^{13}\text{C}$  NMR spectrum of **QII** in  $\text{CDCl}_3$ .  
**Fig. S20.**  $^1\text{H}$  NMR spectrum of 2-(bis(1-isoquinolylmethyl)amino)ethanol in  $\text{CDCl}_3$ .  
**Fig. S21.**  $^1\text{H}/^{13}\text{C}$  NMR spectrum of **IIP** in  $\text{CDCl}_3$ .  
**Fig. S22.**  $^1\text{H}/^{13}\text{C}$  NMR spectrum of **IIQ** in  $\text{CDCl}_3$ .  
**Fig. S23.**  $^1\text{H}/^{13}\text{C}$  NMR spectrum of **III** in  $\text{CDCl}_3$ .

*References*.....S38

*Preparation of copper(II) complexes***PPI-Cu ([Cu(PPI)(ClO<sub>4</sub>)]ClO<sub>4</sub>)**

To a solution of **PQP** (9.3 mg, 24 μmol) in ethanol (0.5 mL) were added Cu(ClO<sub>4</sub>)<sub>2</sub>·6H<sub>2</sub>O (10.7 mg, 29 μmol) in ethanol (0.5 mL). After stirring for 5 min, resulting precipitate was collected by filtration and washed with ethanol to give **PPI-Cu** as a blue powder (5.7 mg, 8.8 μmol, 37%).

HRMS (ESI) *m/z*: [**PPI** + Cu + ClO<sub>4</sub>]<sup>+</sup> calcd. for C<sub>24</sub>H<sub>24</sub>ClCuN<sub>4</sub>O<sub>5</sub> 546.07315; found 546.07146.

mp 211-214 °C.

**PQP-Cu ([Cu(PQP)(ClO<sub>4</sub>)]ClO<sub>4</sub>)**

To a solution of **PQP** (20.2 mg, 52 μmol) in methanol (0.6 mL) were added Cu(ClO<sub>4</sub>)<sub>2</sub>·6H<sub>2</sub>O (18.5 mg, 51 μmol) and NaClO<sub>4</sub>·H<sub>2</sub>O (70.2 mg, 500 mmol) in methanol (0.4 mL), and the solution kept at 4 °C under ether diffusion conditions. The green powder was recrystallized with acetonitrile (0.5 mL) at 4 °C under ether diffusion conditions to afford **PQP-Cu** as green crystals suitable for X-ray crystallography (11.0 mg, 17 μmol, 33%).

Anal Calcd. for C<sub>24</sub>H<sub>24</sub>Cl<sub>2</sub>CuN<sub>4</sub>O<sub>9</sub> (**PQP-Cu**): C, 44.56; H, 3.74; N, 8.66. Found: C, 44.75; H, 3.78; N, 8.87.

**PQQ-Cu ([Cu(PQQ)](ClO<sub>4</sub>)<sub>2</sub>)**

To a solution of **PQQ** (11.1 mg, 26 μmol) in ethanol (0.5 mL) was added Cu(ClO<sub>4</sub>)<sub>2</sub>·6H<sub>2</sub>O (11.7 mg, 27 μmol) in ethanol (0.5 mL). The solution was kept at 4 °C under ether diffusion conditions to afford **PQQ-Cu** as green crystals suitable for X-ray crystallography (11.7 mg, 17 μmol, 65%).

HRMS (ESI) *m/z*: [**PQQ** + Cu + ClO<sub>4</sub>]<sup>+</sup> calcd. for C<sub>28</sub>H<sub>26</sub>ClCuN<sub>4</sub>O<sub>5</sub> 596.08877; found 596.08659.

mp 174-176 °C.

**PQI-Cu ([Cu(PQI)(ClO<sub>4</sub>)]ClO<sub>4</sub>)**

To a solution of **PQI** (11.6 mg, 27 μmol) in ethanol (0.5 mL) were added Cu(ClO<sub>4</sub>)<sub>2</sub>·6H<sub>2</sub>O (10.2 mg, 27 μmol) in ethanol (0.5 mL). After stirring for 5 min, resulting precipitate was collected by filtration and washed with ethanol to afford **PQI-Cu** as a green powder (11.8 mg, 17 μmol, 65%).

HRMS (ESI) *m/z*: [**PQI** + Cu + ClO<sub>4</sub>]<sup>+</sup> calcd. for C<sub>28</sub>H<sub>26</sub>ClCuN<sub>4</sub>O<sub>5</sub> 596.08877; found 596.08606.

mp 201-205 °C.

**PIP-Cu·CH<sub>3</sub>CN ([Cu(PIP)(ClO<sub>4</sub>)]ClO<sub>4</sub>·CH<sub>3</sub>CN)**

To a solution of **PIP** (10.7 mg, 28 μmol) in ethanol (0.5 mL) was added Cu(ClO<sub>4</sub>)<sub>2</sub>·6H<sub>2</sub>O (11.9 mg, 32 μmol) in ethanol (0.5 mL). After stirring for 5 min, resulting precipitate was collected by filtration and washed with ethanol. The green powder was recrystallized with acetonitrile (1.0 mL) in the presence of NaClO<sub>4</sub>·H<sub>2</sub>O (11 mg, 90 μmol) at 4 °C under ether diffusion conditions to afford **PIP-Cu·CH<sub>3</sub>CN** as green crystals suitable for X-ray crystallography (12.0 mg, 19 μmol, 68%).

Anal Calcd. for C<sub>26</sub>H<sub>27</sub>Cl<sub>2</sub>CuN<sub>5</sub>O<sub>9</sub> (**PIP-Cu·CH<sub>3</sub>CN**): C, 45.39; H, 3.96; N, 10.18. Found: C, 45.06; H, 3.93; N, 10.12.

mp 212-214 °C.

**PIQ-Cu ([Cu(PIQ)](ClO<sub>4</sub>)<sub>2</sub>)**

To a solution of **PIQ** (19.8 mg, 23 μmol) in ethanol (0.5 mL) were added Cu(ClO<sub>4</sub>)<sub>2</sub>·6H<sub>2</sub>O (8.3 mg, 22 μmol) in ethanol (0.5 mL). After stirring for 5 min, resulting precipitate was collected by filtration and washed with ethanol to afford **PIQ-Cu** as a blue powder (11.1 mg, 16 μmol, 72%).

HRMS (ESI) *m/z*: [**PIQ** + Cu + ClO<sub>4</sub>]<sup>+</sup> calcd. for C<sub>28</sub>H<sub>26</sub>ClCuN<sub>4</sub>O<sub>5</sub> 596.08877; found 596.08768.

mp 195-197 °C.

**PII-Cu ([Cu(PII)(ClO<sub>4</sub>)]ClO<sub>4</sub>)**

To a solution of **PII** (10.6 mg, 24 μmol) in ethanol (0.5 mL) were added Cu(ClO<sub>4</sub>)<sub>2</sub>·6H<sub>2</sub>O (11.9 mg, 32 μmol) in ethanol (0.5 mL). After stirring for 5 min, resulting precipitate was collected by filtration and washed with ethanol to afford **PII-Cu** as a blue powder (10.6 mg, 15 μmol, 63%).

HRMS (ESI) *m/z*: [**PII** + Cu + ClO<sub>4</sub>]<sup>+</sup> calcd. for C<sub>28</sub>H<sub>26</sub>ClCuN<sub>4</sub>O<sub>5</sub> 596.08877; found 596.0874.

mp 195-197 °C.

**QQP-Cu ([Cu(QQP)(ClO<sub>4</sub>)]ClO<sub>4</sub>)**

To a solution of **QQP** (10.5 mg, 24 μmol) in ethanol (0.5 mL) were added Cu(ClO<sub>4</sub>)<sub>2</sub>·6H<sub>2</sub>O (9.4 mg, 25 μmol) in ethanol (0.5 mL). After stirring for 5 min, resulting precipitate was collected by filtration and washed with ethanol to afford **QQP-Cu** as a green powder (9.1 mg, 13 μmol, 54%).

HRMS (ESI) *m/z*: [**QQP** + Cu]<sup>+</sup> calcd. for C<sub>28</sub>H<sub>26</sub>CuN<sub>4</sub>O<sub>1</sub> 497.14026; found 497.14917.

mp 181-184 °C.

**QQQ-Cu ([Cu(QQQ)](ClO<sub>4</sub>)<sub>2</sub>)**

To a solution of **QQQ** (13.1 mg, 27 μmol) in ethanol (0.5 mL) were added Cu(ClO<sub>4</sub>)<sub>2</sub>·6H<sub>2</sub>O (11.2 mg, 30 μmol) in ethanol (0.5 mL). After stirring for 5 min, resulting precipitate was collected by filtration and washed with ethanol to afford **QQQ-Cu** as a green powder (1.5 mg, 2.0 μmol, 7%).

HRMS (ESI) *m/z*: [**QQQ** + Cu + ClO<sub>4</sub>]<sup>+</sup> calcd. for C<sub>32</sub>H<sub>28</sub>ClCuN<sub>4</sub>O<sub>5</sub> 646.10442; found 646.10210.

mp 201-204 °C.

**QQI-Cu ([Cu(QQI)(ClO<sub>4</sub>)]ClO<sub>4</sub>)**

To a solution of **QQI** (5.6 mg, 12 μmol) in ethanol (0.5 mL) were added Cu(ClO<sub>4</sub>)<sub>2</sub>·6H<sub>2</sub>O (5.2 mg, 14 μmol) in ethanol (0.5 mL). After stirring for 5 min, resulting precipitate

was collected by filtration and washed with ethanol to afford **QQI-Cu** as a green powder (3.0 mg, 4.0  $\mu\text{mol}$ , 35%).

HRMS (ESI)  $m/z$ : [**QQI** + Cu + ClO<sub>4</sub>]<sup>+</sup> calcd. for C<sub>32</sub>H<sub>28</sub>ClCuN<sub>4</sub>O<sub>5</sub> 646.10442; found 646.10282.

mp 180-183 °C.

### **QIP-Cu**

To a solution of **QIP** (13.0 mg, 30  $\mu\text{mol}$ ) in ethanol (0.5 mL) were added Cu(ClO<sub>4</sub>)<sub>2</sub>·6H<sub>2</sub>O (14.1 mg, 38  $\mu\text{mol}$ ) in ethanol (0.5 mL). After stirring for 5 min, resulting precipitate was collected by filtration and washed with ethanol to afford **QIP-Cu** as a green powder (10.1 mg, 14  $\mu\text{mol}$ , 48%).

HRMS (ESI)  $m/z$ : [**QIP** + Cu + ClO<sub>4</sub>]<sup>+</sup> calcd. for C<sub>28</sub>H<sub>26</sub>ClCuN<sub>4</sub>O<sub>5</sub> 596.08877; found 596.0862.

mp 247-250 °C.

### **QIQ-Cu**

To a solution of **QIQ** (13.1 mg, 27  $\mu\text{mol}$ ) in ethanol (0.5 mL) were added Cu(ClO<sub>4</sub>)<sub>2</sub>·6H<sub>2</sub>O (10.1 mg, 27  $\mu\text{mol}$ ) in ethanol (0.5 mL). After stirring for 5 min, resulting precipitate was collected by filtration and washed with ethanol to afford **QIQ-Cu** as a green powder (10.0 mg, 13  $\mu\text{mol}$ , 50%).

Anal Calcd. for C<sub>32</sub>H<sub>28</sub>Cl<sub>2</sub>CuN<sub>4</sub>O<sub>9</sub> (**QIQ-Cu**): C, 51.45; H, 3.78; N, 7.50. Found: C, 52.00; H, 3.74; N, 7.41.

### **QII-Cu**

To a solution of **QII** (12.5 mg, 26  $\mu\text{mol}$ ) in ethanol (0.5 mL) were added Cu(ClO<sub>4</sub>)<sub>2</sub>·6H<sub>2</sub>O (9.6 mg, 26  $\mu\text{mol}$ ) in ethanol (0.5 mL). After stirring for 5 min, resulting precipitate was collected by filtration and washed with ethanol to afford **QII-Cu** as a yellow green powder (6.6 mg, 8.8  $\mu\text{mol}$ , 34%).

Anal Calcd. for  $C_{32}H_{28}Cl_2CuN_4O_9$  (**QII-Cu**): C, 51.45; H, 3.78; N, 7.50. Found: C, 51.72; H, 3.76; N, 7.30.

### **IIP-Cu**

To a solution of **IIP** (11.4 mg, 26  $\mu$ mol) in ethanol (0.5 mL) were added  $Cu(ClO_4)_2 \cdot 6H_2O$  (9.8 mg, 26  $\mu$ mol) in ethanol (0.5 mL). After stirring for 5 min, resulting precipitate was collected by filtration and washed with ethanol to afford **IIP-Cu** as a blue powder (11.9 mg, 17  $\mu$ mol, 65%).

Anal Calcd. for  $C_{28}H_{27}Cl_2CuN_4O_{9.5}$  (**IIP-Cu** $\cdot$ 0.5 $H_2O$ ): C, 47.64; H, 3.85; N, 7.94. Found: C, 47.87; H, 3.60; N, 7.93.

mp 229-232 °C.

### **IIQ-Cu**

To a solution of **IIQ** (12.5 mg, 26  $\mu$ mol) in ethanol (0.5 mL) were added  $Cu(ClO_4)_2 \cdot 6H_2O$  (9.5 mg, 26  $\mu$ mol) in ethanol (0.5 mL). After stirring for 5 min, resulting precipitate was collected by filtration and washed with ethanol to afford **QQI-Cu** as a blue powder (14.9 mg, 20  $\mu$ mol, 78%).

Anal Calcd. for  $C_{32}H_{30}Cl_2CuN_4O_{10}$  (**IIQ-Cu** $\cdot$  $H_2O$ ): C, 50.24; H, 3.95; N, 7.32. Found: C, 49.95; H, 3.71; N, 7.23.

mp 228-232 °C.

### **III-Cu** $\cdot$ **CH<sub>3</sub>CN** (**[Cu(III)(ClO<sub>4</sub>)]ClO<sub>4</sub>·CH<sub>3</sub>CN**)

To a solution of **III** (12.0 mg, 25  $\mu$ mol) in ethanol (0.5 mL) was added  $Cu(ClO_4)_2 \cdot 6H_2O$  (10.9 mg, 29  $\mu$ mol) in ethanol (0.5 mL). After stirring for 5 min, resulting precipitate was collected by filtration and washed with ethanol. The green powder was recrystallized with acetonitrile (0.7 mL) in the presence of  $NaClO_4 \cdot H_2O$  (22 mg, 180  $\mu$ mol) at 4 °C under ether diffusion conditions to afford **PIP-Cu** $\cdot$ **CH<sub>3</sub>CN** as green crystals suitable for X-ray crystallography (9.0 mg, 12  $\mu$ mol, 48%).



Anal Calcd. for  $C_{32}H_{29}Cl_2CuN_4O_{9.5}$  (**III-Cu** $\cdot 0.5H_2O$ ): C, 50.84; H, 3.87; N, 7.41. Found: C, 50.94; H, 3.72; N, 7.34.

mp 229-231 °C.

*X-ray crystallography***Table S1.** Crystallographic data for [Cu(PQP)(ClO<sub>4</sub>)]ClO<sub>4</sub> (PQP-Cu) and [Cu(PQQ)](ClO<sub>4</sub>)<sub>2</sub> (PQQ-Cu)

|                                                                     | PQP-Cu                                                                          | PQQ-Cu                                                                          |
|---------------------------------------------------------------------|---------------------------------------------------------------------------------|---------------------------------------------------------------------------------|
| Formula                                                             | C <sub>24</sub> H <sub>24</sub> Cl <sub>2</sub> CuN <sub>4</sub> O <sub>9</sub> | C <sub>28</sub> H <sub>26</sub> Cl <sub>2</sub> CuN <sub>4</sub> O <sub>9</sub> |
| FW                                                                  | 646.93                                                                          | 696.99                                                                          |
| Crystal system                                                      | triclinic                                                                       | monoclinic                                                                      |
| Space group                                                         | <i>P</i> -1                                                                     | <i>P</i> 2 <sub>1</sub> / <i>c</i>                                              |
| <i>a</i> , Å                                                        | 8.9204(11)                                                                      | 19.122(5)                                                                       |
| <i>b</i> , Å                                                        | 10.8760(14)                                                                     | 8.046(2)                                                                        |
| <i>c</i> , Å                                                        | 14.6803(19)                                                                     | 19.183(5)                                                                       |
| $\alpha$ , deg                                                      | 74.810(5)                                                                       | 90                                                                              |
| $\beta$ , deg                                                       | 77.611(6)                                                                       | 103.718(3)                                                                      |
| $\gamma$ , deg                                                      | 70.889(5)                                                                       | 90                                                                              |
| <i>V</i> , Å <sup>3</sup>                                           | 1285.7(3)                                                                       | 2867.1(13)                                                                      |
| <i>Z</i>                                                            | 2                                                                               | 4                                                                               |
| <i>D</i> <sub>calc</sub> , g cm <sup>-3</sup>                       | 1.671                                                                           | 1.615                                                                           |
| $\mu$ , mm <sup>-1</sup>                                            | 1.193                                                                           | 1.0104                                                                          |
| 2 $\theta$ <sub>max</sub> , deg                                     | 55                                                                              | 54.9                                                                            |
| temp, K                                                             | 173                                                                             | 173                                                                             |
| no. reflns collected                                                | 9838                                                                            | 21517                                                                           |
| no. reflns used                                                     | 5564                                                                            | 6536                                                                            |
| no. of params                                                       | 361                                                                             | 406                                                                             |
| <i>R</i> <sub>int</sub>                                             | 0.0179                                                                          | 0.0270                                                                          |
| Final <i>R</i> 1 ( <i>I</i> > 2 $\sigma$ ( <i>I</i> )) <sup>a</sup> | 0.0343                                                                          | 0.0570                                                                          |
| <i>wR</i> 2 (all data) <sup>b</sup>                                 | 0.0995                                                                          | 0.1566                                                                          |
| GOF                                                                 | 1.014                                                                           | 1.065                                                                           |

<sup>a</sup>*R*1 =  $\Sigma ||F_o| - |F_c|| / \Sigma |F_o|$ . <sup>b</sup>*wR*2 =  $[\Sigma w[(F_o^2 - F_c^2)^2] / \Sigma [w(F_o^2)^2]]^{1/2}$ .

**Table S2.** Crystallographic data for [Cu(**PIP**)(ClO<sub>4</sub>)]ClO<sub>4</sub>·CH<sub>3</sub>CN (**PIP-Cu**·CH<sub>3</sub>CN) and [Cu(**III**)(ClO<sub>4</sub>)]ClO<sub>4</sub>·CH<sub>3</sub>CN (**III-Cu**·CH<sub>3</sub>CN)

|                                                            | <b>PIP-Cu</b> ·CH <sub>3</sub> CN                                               | <b>III-Cu</b> ·CH <sub>3</sub> CN                                               |
|------------------------------------------------------------|---------------------------------------------------------------------------------|---------------------------------------------------------------------------------|
| Formula                                                    | C <sub>26</sub> H <sub>27</sub> Cl <sub>2</sub> CuN <sub>5</sub> O <sub>9</sub> | C <sub>34</sub> H <sub>31</sub> Cl <sub>2</sub> CuN <sub>5</sub> O <sub>9</sub> |
| FW                                                         | 687.98                                                                          | 788.10                                                                          |
| Crystal system                                             | triclinic                                                                       | monoclinic                                                                      |
| Space group                                                | <i>P</i> -1                                                                     | <i>P</i> 2 <sub>1</sub> / <i>c</i>                                              |
| <i>a</i> , Å                                               | 9.9443(1)                                                                       | 11.4717(13)                                                                     |
| <i>b</i> , Å                                               | 11.5048(3)                                                                      | 13.2852(15)                                                                     |
| <i>c</i> , Å                                               | 13.8412(1)                                                                      | 22.475(3)                                                                       |
| α, deg                                                     | 77.424(14)                                                                      | 90                                                                              |
| β, deg                                                     | 65.657(12)                                                                      | 103.2305(10)                                                                    |
| γ, deg                                                     | 80.071(14)                                                                      | 90                                                                              |
| <i>V</i> , Å <sup>3</sup>                                  | 1402.03(15)                                                                     | 3334.4(7)                                                                       |
| <i>Z</i>                                                   | 2                                                                               | 4                                                                               |
| <i>D</i> <sub>calc</sub> , g cm <sup>-3</sup>              | 1.630                                                                           | 1.570                                                                           |
| μ, mm <sup>-1</sup>                                        | 1.0328                                                                          | 0.8799                                                                          |
| 2θ <sub>max</sub> , deg                                    | 54.9                                                                            | 55                                                                              |
| temp, K                                                    | 153                                                                             | 153                                                                             |
| no. reflns collected                                       | 10945                                                                           | 33274                                                                           |
| no. reflns used                                            | 6077                                                                            | 7630                                                                            |
| no. of params                                              | 389                                                                             | 461                                                                             |
| <i>R</i> <sub>int</sub>                                    | 0.0226                                                                          | 0.0557                                                                          |
| Final <i>R</i> 1 ( <i>I</i> > 2σ( <i>I</i> )) <sup>a</sup> | 0.0502                                                                          | 0.0572                                                                          |
| <i>wR</i> 2 (all data) <sup>b</sup>                        | 0.1331                                                                          | 0.1697                                                                          |
| GOF                                                        | 1.124                                                                           | 1.081                                                                           |

<sup>a</sup>*R*1 = Σ||*F*<sub>o</sub>| - |*F*<sub>c</sub>||/Σ|*F*<sub>o</sub>|. <sup>b</sup>*wR*2 = [Σ*w*[(*F*<sub>o</sub><sup>2</sup> - *F*<sub>c</sub><sup>2</sup>)<sup>2</sup>]/Σ[*w*(*F*<sub>o</sub><sup>2</sup>)<sup>2</sup>]<sup>1/2</sup>.

**Table S3.** Selected Bond Angles (°) for **PPP-Cu**, **PPQ-Cu**, **PQP-Cu**, **PQQ-Cu**, **PIP-Cu** and **III-Cu**

|          | <b>PPP-Cu<sup>a</sup></b> | <b>PPQ-Cu<sup>a</sup></b> | <b>PQP-Cu</b> | <b>PQQ-Cu</b> | <b>PIP-Cu</b> | <b>III-Cu</b> |
|----------|---------------------------|---------------------------|---------------|---------------|---------------|---------------|
| O1-Cu-N1 | 81.0                      | 83.7                      | 82.2          | 84.1          | 84.4          | 83.6          |
| O1-Cu-N2 | 91.1                      | 97.5                      | 100.3         | 100.9         | 94.7          | 98.4          |
| O1-Cu-N3 | 97.6                      | 98.1                      | 96.9          | 95.6          | 96.5          | 99.1          |
| O1-Cu-N4 | 75.0                      | 77.3                      | 77.0          | 78.9          | 77.6          | 76.0          |
| N1-Cu-N2 | 84.3                      | 84.2                      | 83.3          | 83.7          | 83.4          | 84.2          |
| N1-Cu-N3 | 82.7                      | 83.5                      | 81.5          | 82.3          | 83.7          | 82.4          |
| N1-Cu-N4 | 155.8                     | 160.9                     | 158.7         | 161.6         | 161.9         | 159.4         |
| N2-Cu-N3 | 163.0                     | 158.8                     | 155.2         | 157.1         | 162.0         | 156.7         |
| N2-Cu-N4 | 94.0                      | 98.0                      | 95.9          | 92.6          | 99.9          | 95.5          |
| N3-Cu-N4 | 102.4                     | 99.3                      | 105.4         | 106.2         | 96.3          | 103.7         |
| O1-Cu-O2 | 169.8                     | –                         | 164.6         | –             | 172.0         | 170.0         |
| O2-Cu-N1 | 109.1                     | –                         | 112.5         | –             | 88.1          | 87.5          |
| O2-Cu-N2 | 87.8                      | –                         | 86.4          | –             | 81.5          | 76.0          |
| O2-Cu-N3 | 86.3                      | –                         | 81.5          | –             | 85.6          | 84.4          |
| O2-Cu-N4 | 95.0                      | –                         | 88.6          | –             | 110.0         | 112.5         |

<sup>a</sup> Ref. S1.

*Cyclic voltammetry*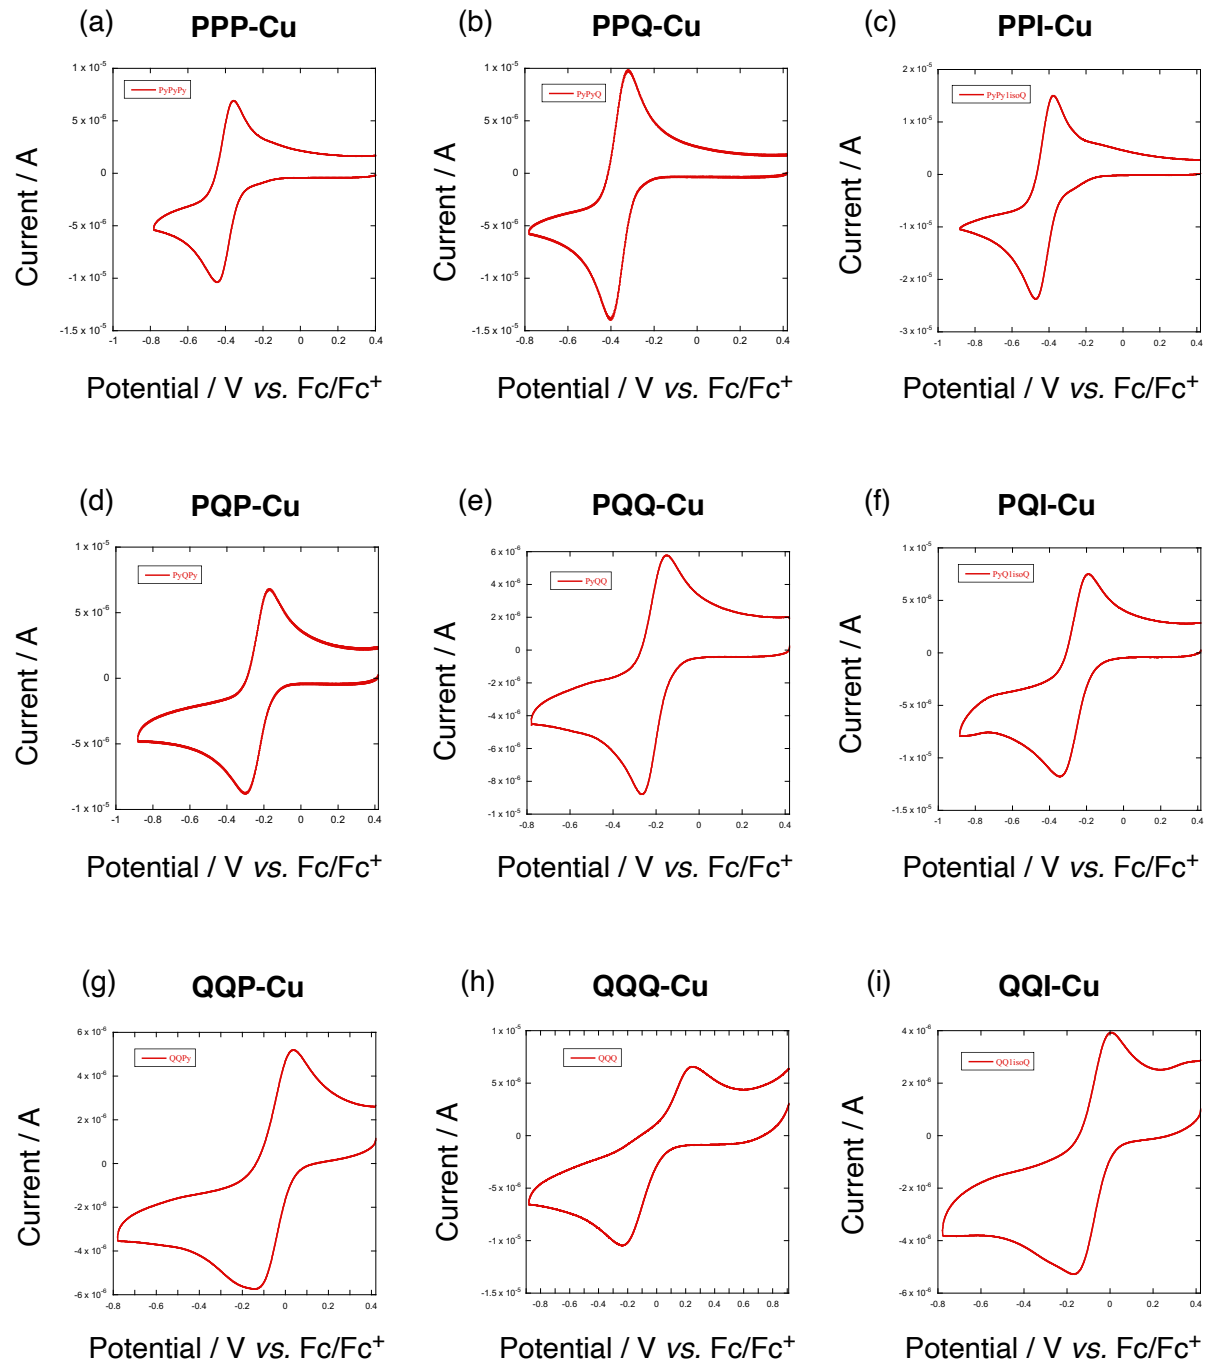

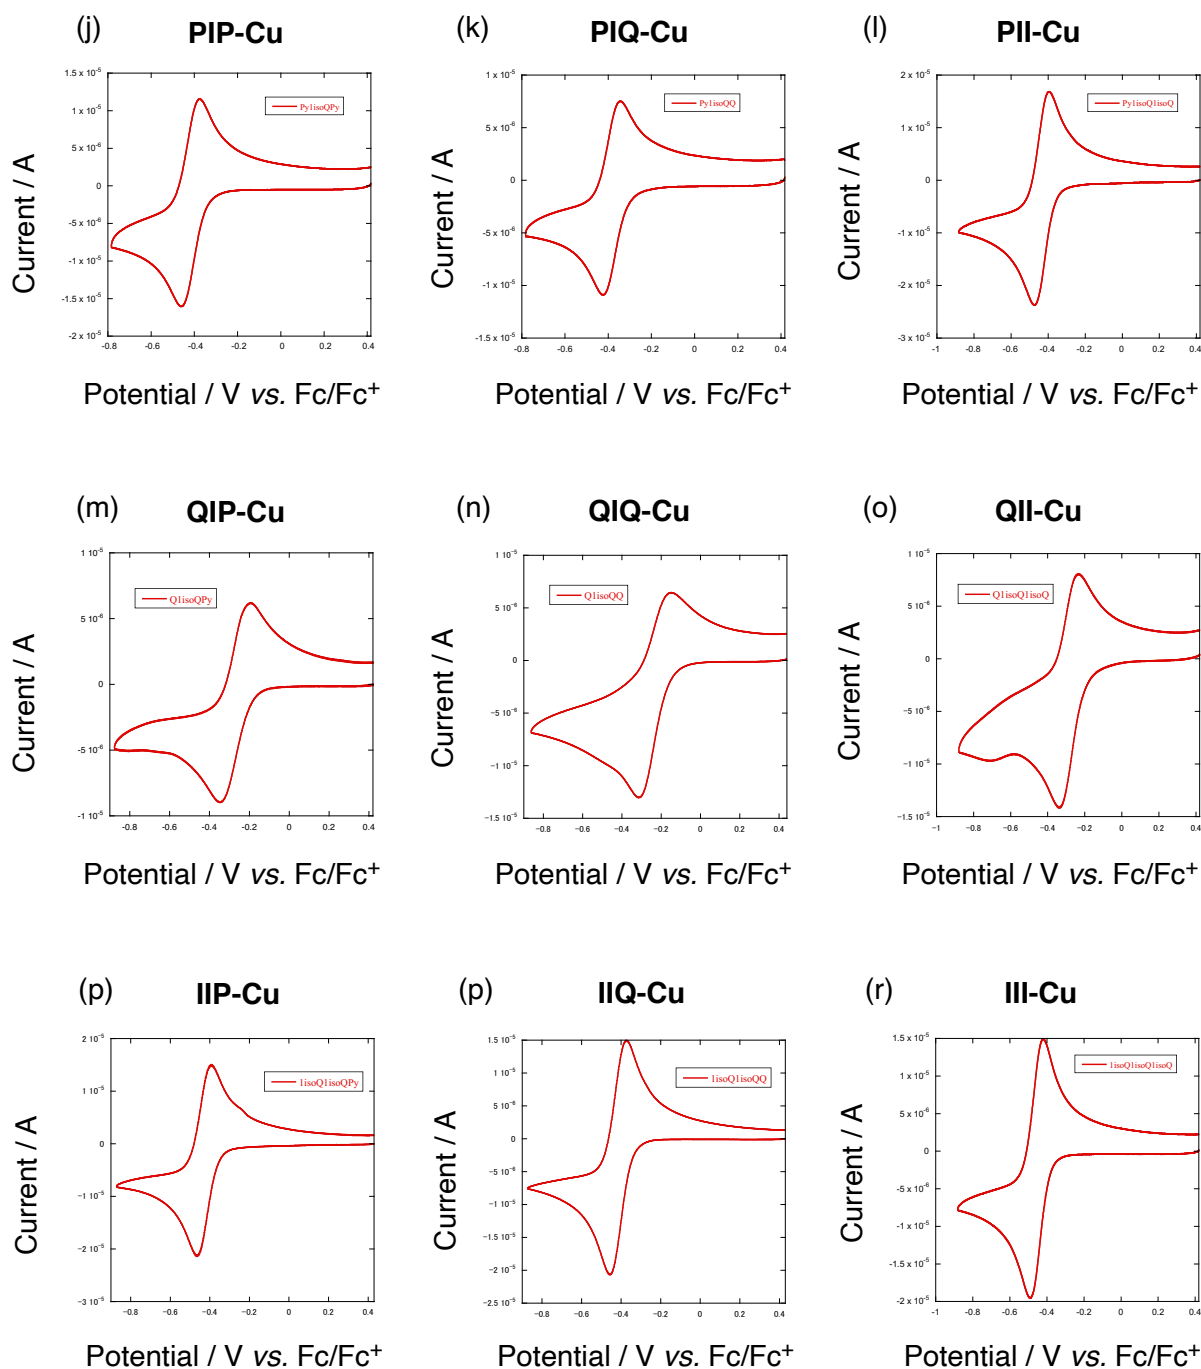

**Fig. S1.** Cyclic voltammogram of copper(II) complexes in acetonitrile (1 mM, scan rate 100 mV/s). (a) PPP-Cu, (b) PPQ-Cu, (c) PPI-Cu, (d) PQP-Cu, (e) PQQ-Cu, (f) PQI-Cu, (g) QQP-Cu, (h) QQQ-Cu, (i) QQI-Cu, (j) PIP-Cu, (k) PIQ-Cu, (l) PII-Cu, (m) QIP-Cu, (n) QIQ-Cu, (o) QUI-Cu, (p) IIP-Cu, (q) IIQ-Cu and (r) III-Cu.

*Absorption spectrum*(a) **PPP-Cu**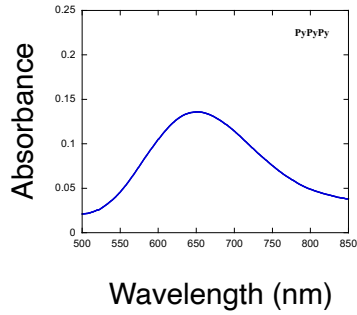(b) **PPQ-Cu**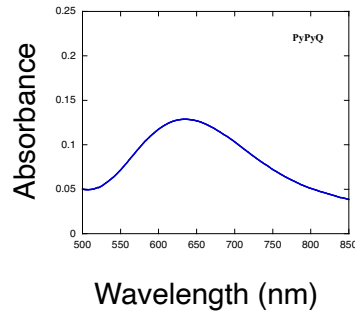(c) **PPI-Cu**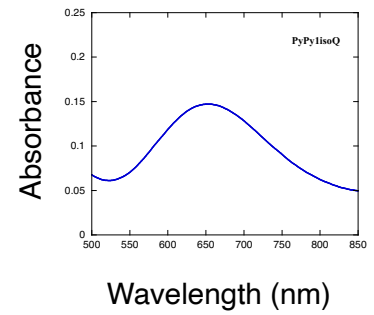(d) **PQP-Cu**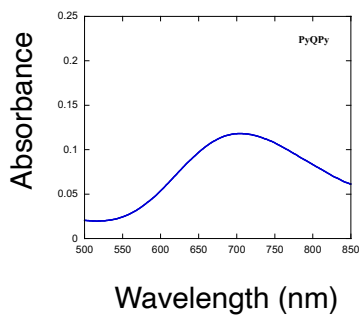(e) **PQQ-Cu**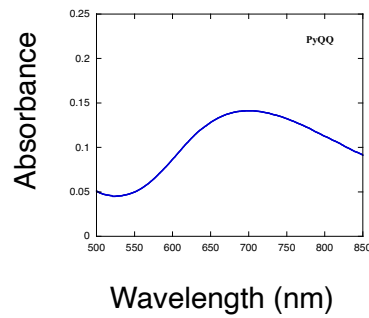(f) **PQI-Cu**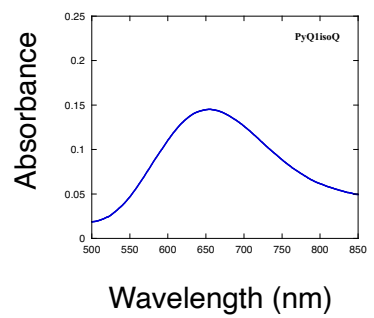(g) **QQP-Cu**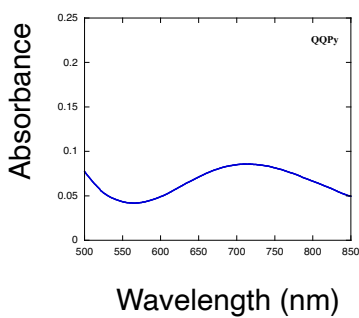(h) **QQQ-Cu**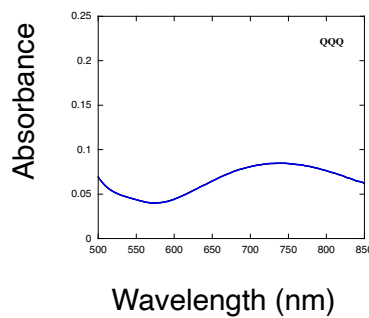(i) **QQI-Cu**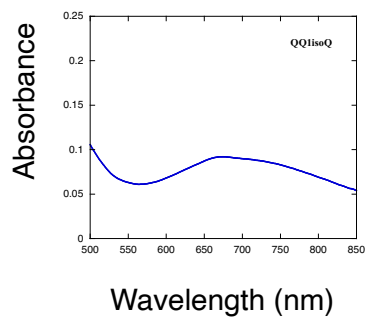

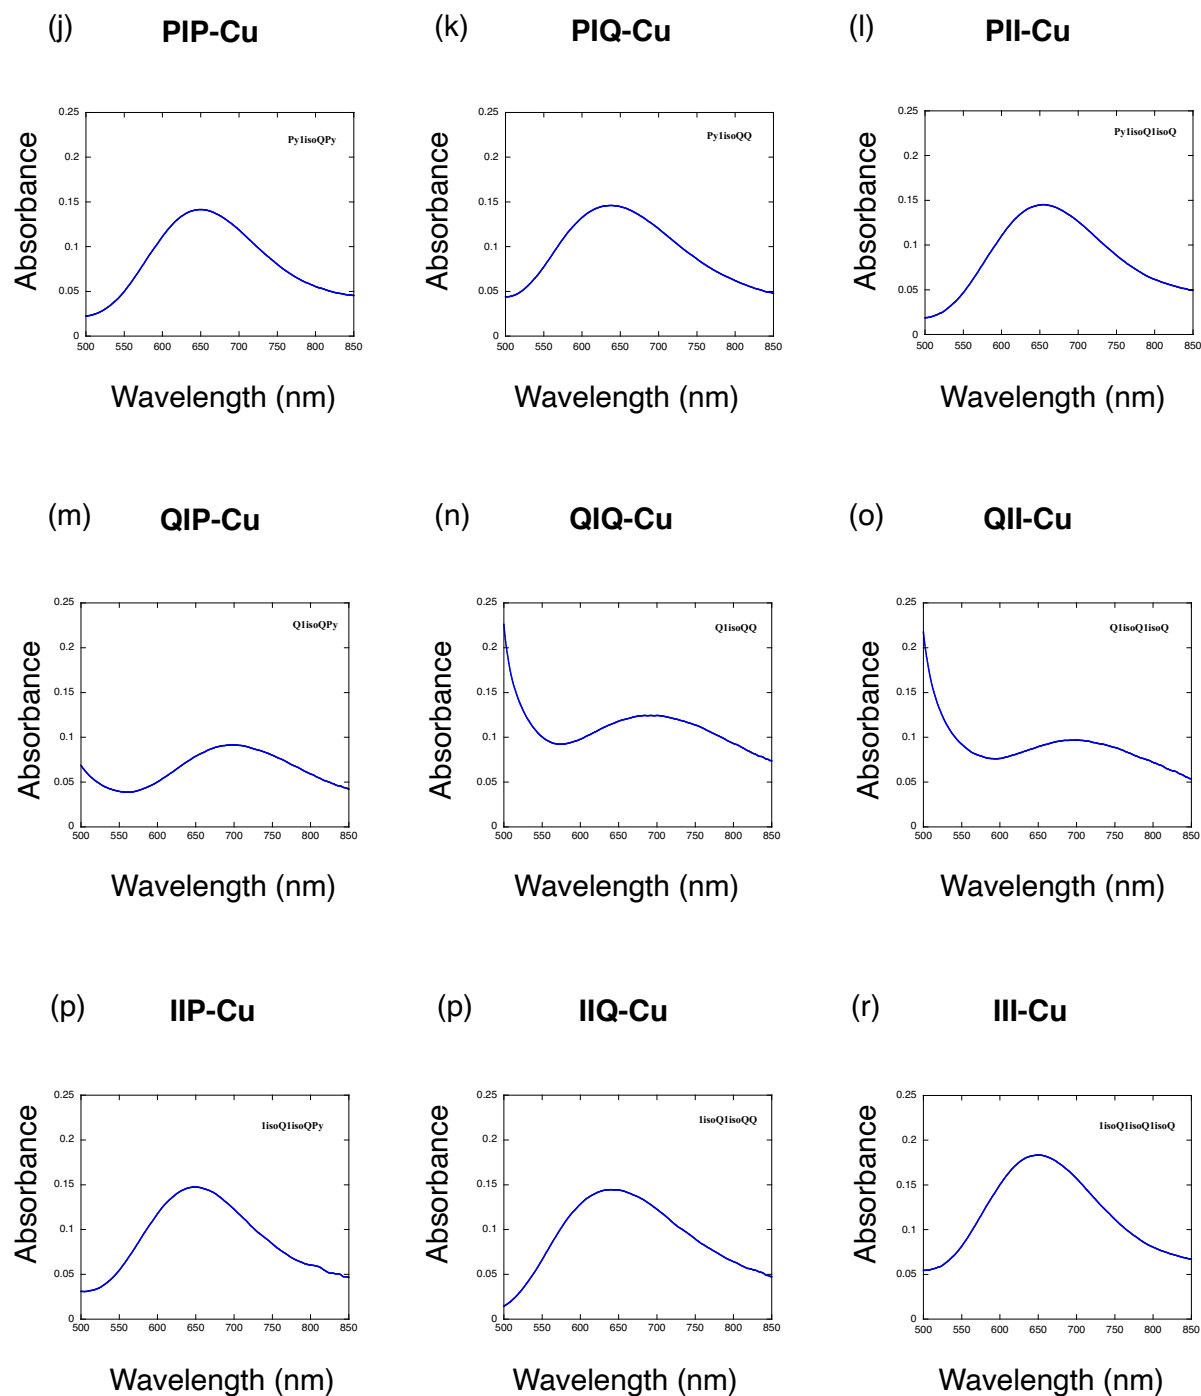

**Fig. S2.** Absorption spectrum of copper(II) complexes in methanol (1 mM). (a) **PPP-Cu**, (b) **PPQ-Cu**, (c) **PPI-Cu**, (d) **PQP-Cu**, (e) **PQQ-Cu**, (f) **PQI-Cu**, (g) **QQP-Cu**, (h) **QQQ-Cu**, (i) **QQI-Cu**, (j) **PIP-Cu**, (k) **PIQ-Cu**, (l) **PII-Cu**, (m) **QIP-Cu**, (n) **QIQ-Cu**, (o) **QII-Cu**, (p) **IIP-Cu**, (q) **IIQ-Cu** and (r) **III-Cu**.



$^1\text{H}/^{13}\text{C}$  NMR spectrum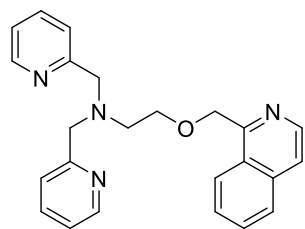

PPI

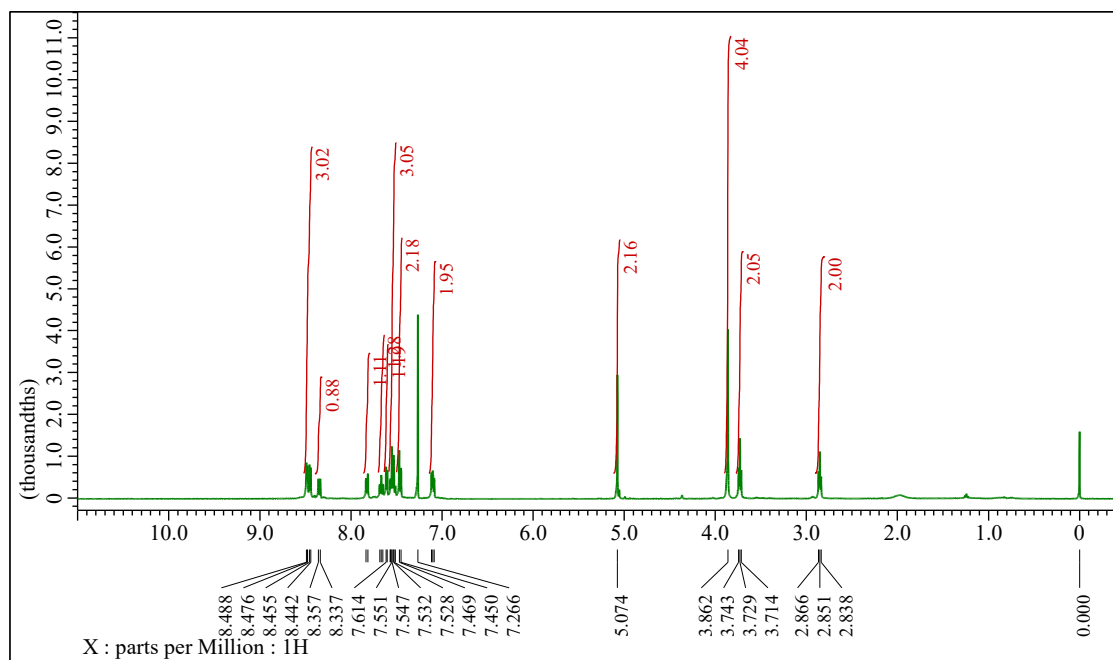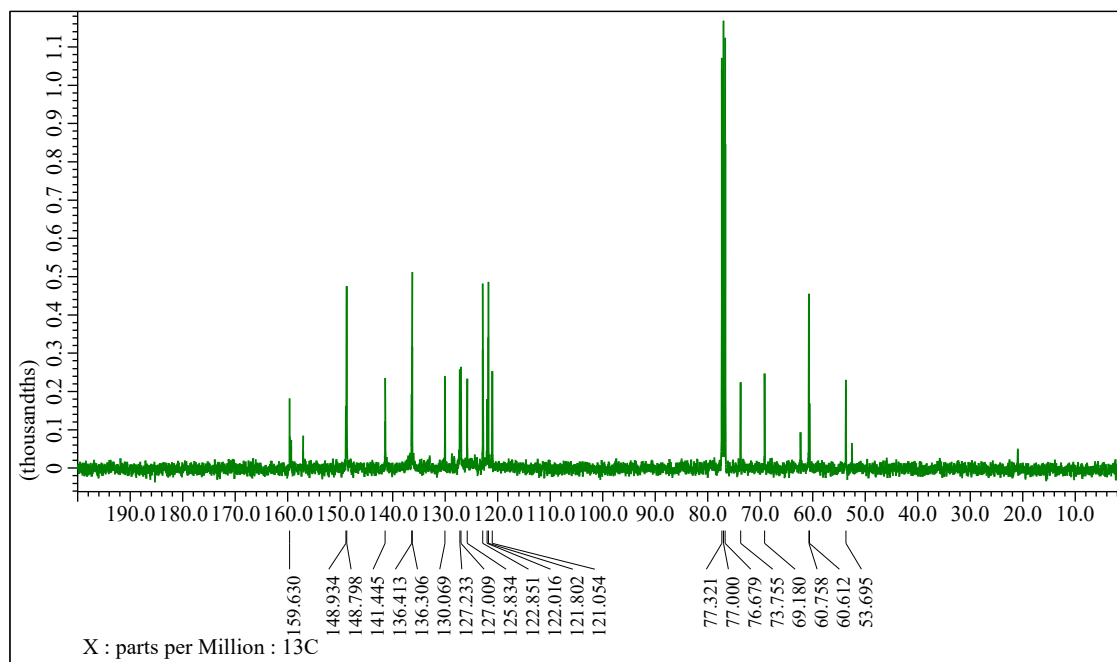Fig. S3.  $^1\text{H}/^{13}\text{C}$  NMR spectrum of PPI in  $\text{CDCl}_3$ .

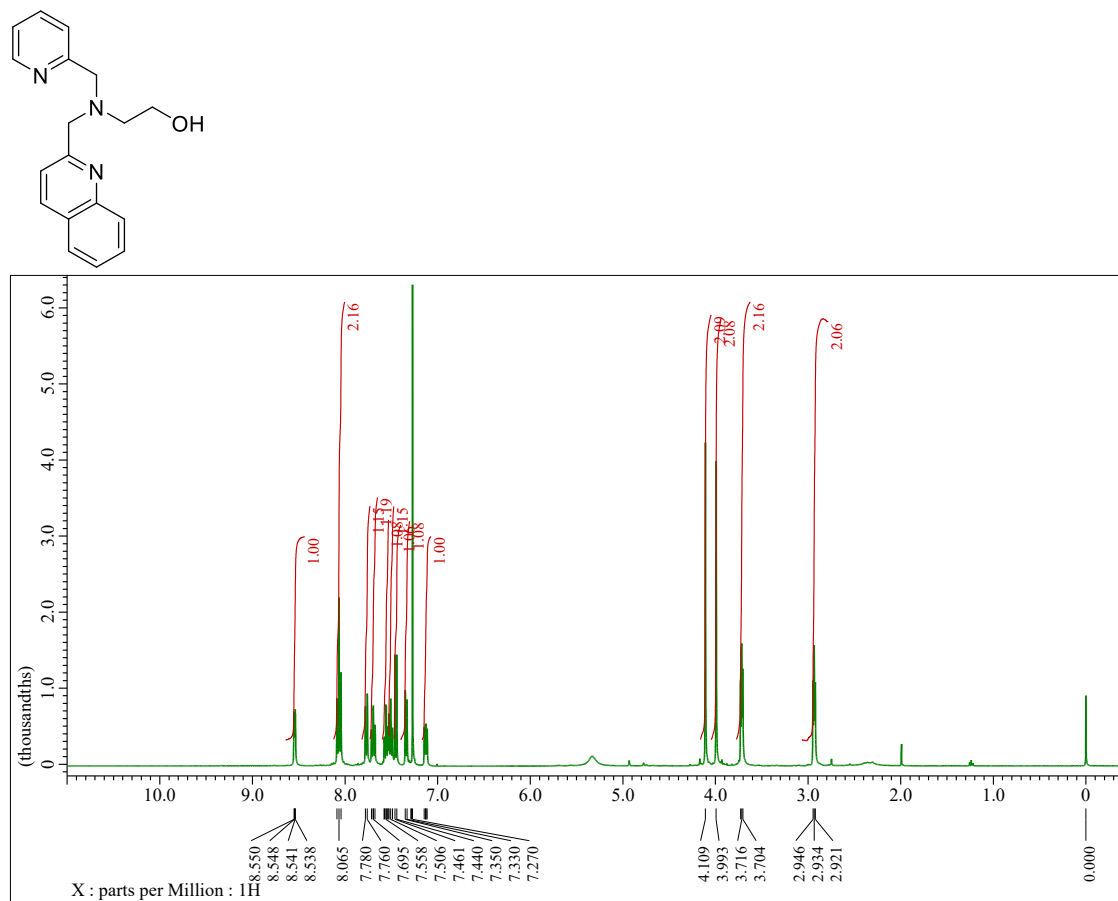

**Fig. S4.** <sup>1</sup>H NMR spectrum of 2-((2-pyridylmethyl)(2-quinolylmethyl)-amino)ethanol in CDCl<sub>3</sub>.

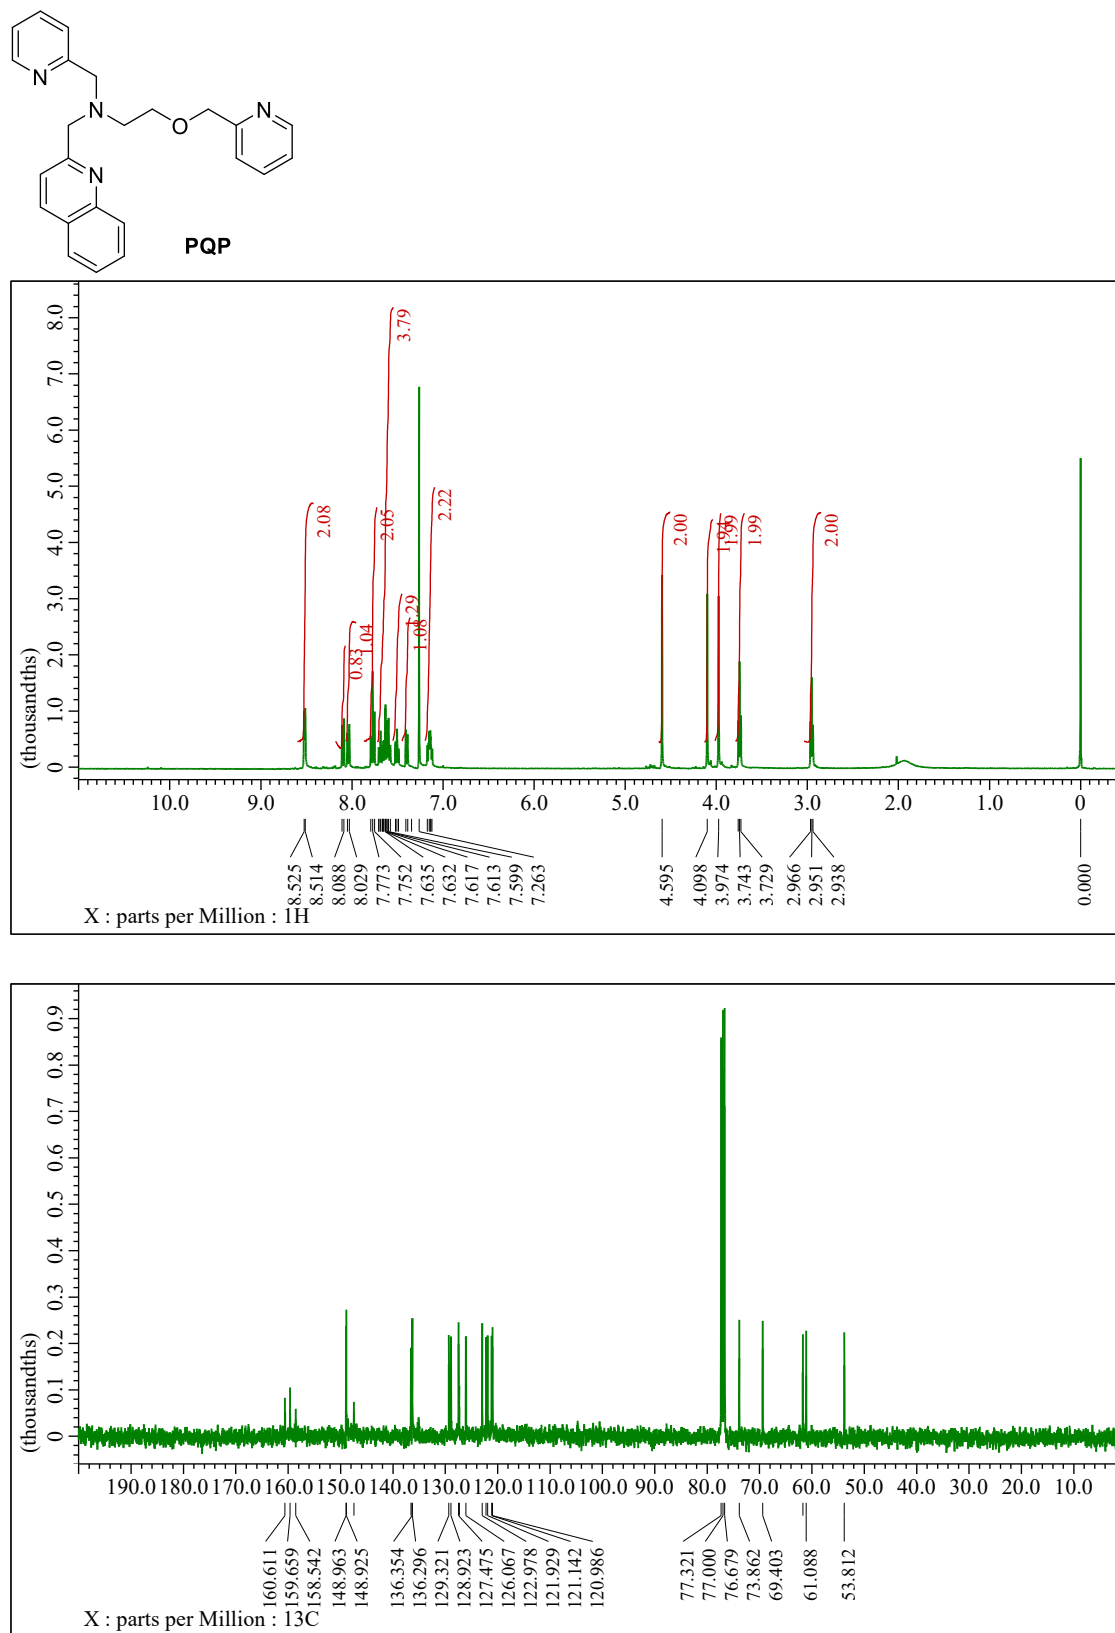

**Fig. S5.**  $^1\text{H}/^{13}\text{C}$  NMR spectrum of **PQP** in CDCl<sub>3</sub>.

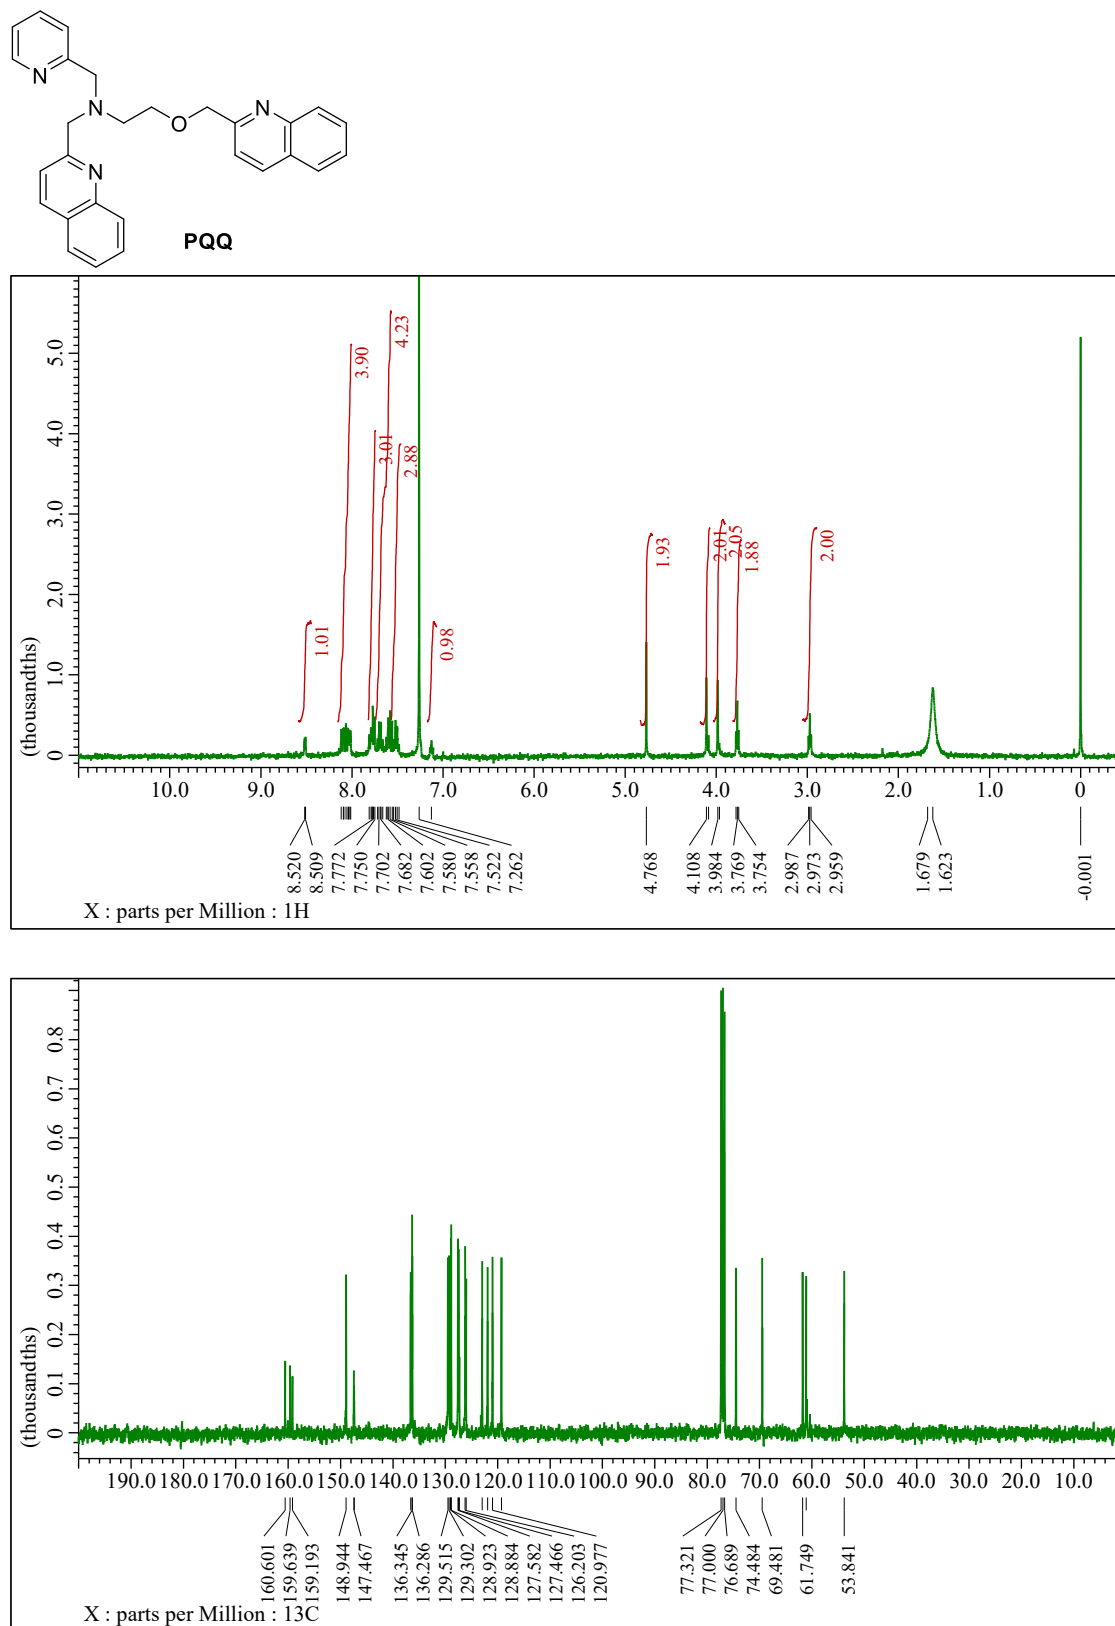

**Fig. S6.**  $^1\text{H}/^{13}\text{C}$  NMR spectrum of PQQ in CDCl<sub>3</sub>.

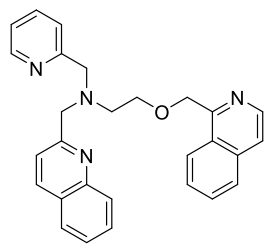

PQI

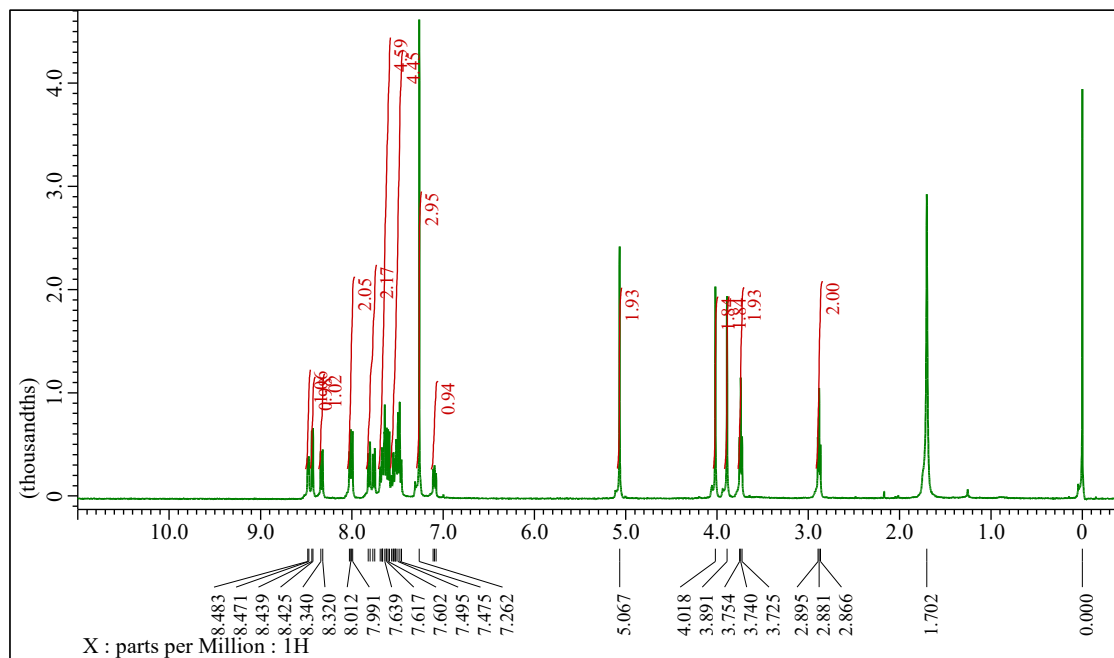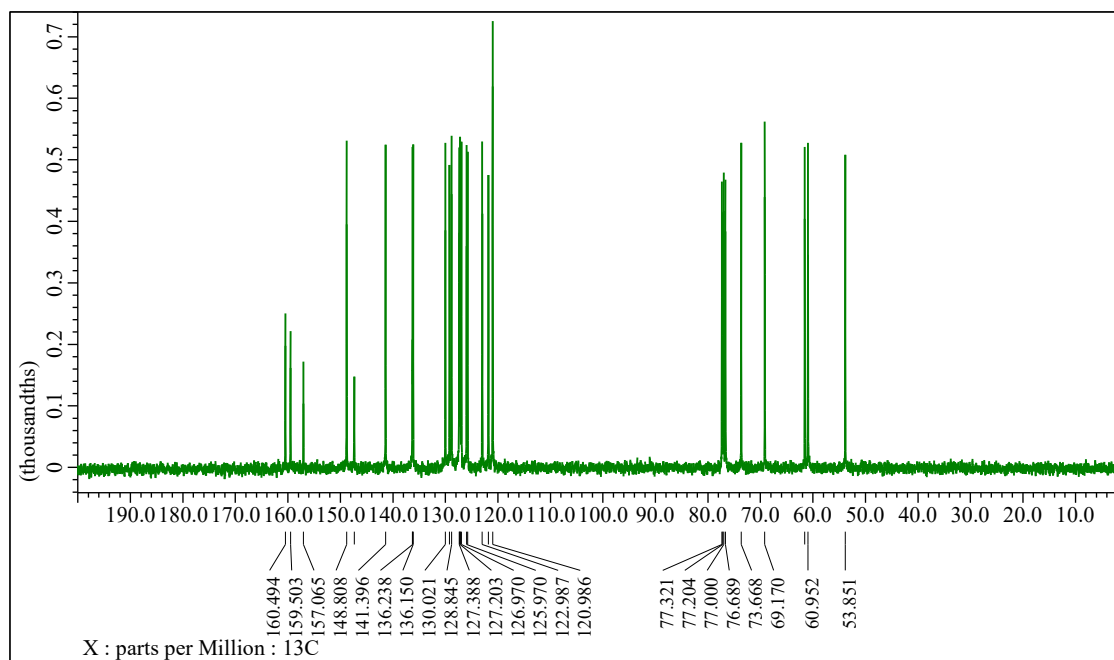Fig. S7.  $^1\text{H}/^{13}\text{C}$  NMR spectrum of PQI in  $\text{CDCl}_3$ .

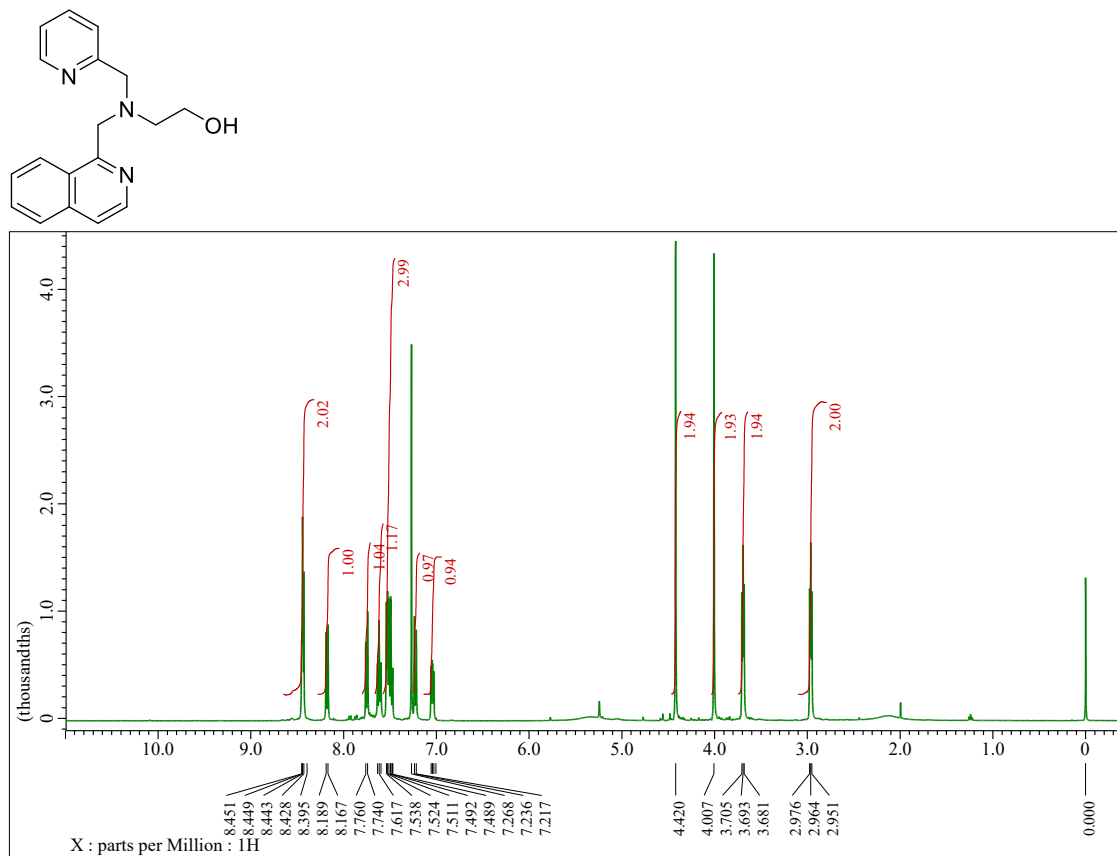

**Fig. S8.** <sup>1</sup>H NMR spectrum of 2-((2-pyridylmethyl)(1-isoquinolylmethyl)-amino)ethanol in CDCl<sub>3</sub>.

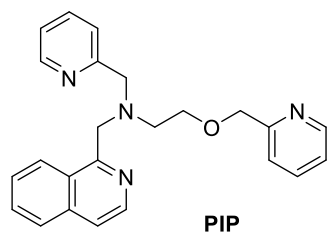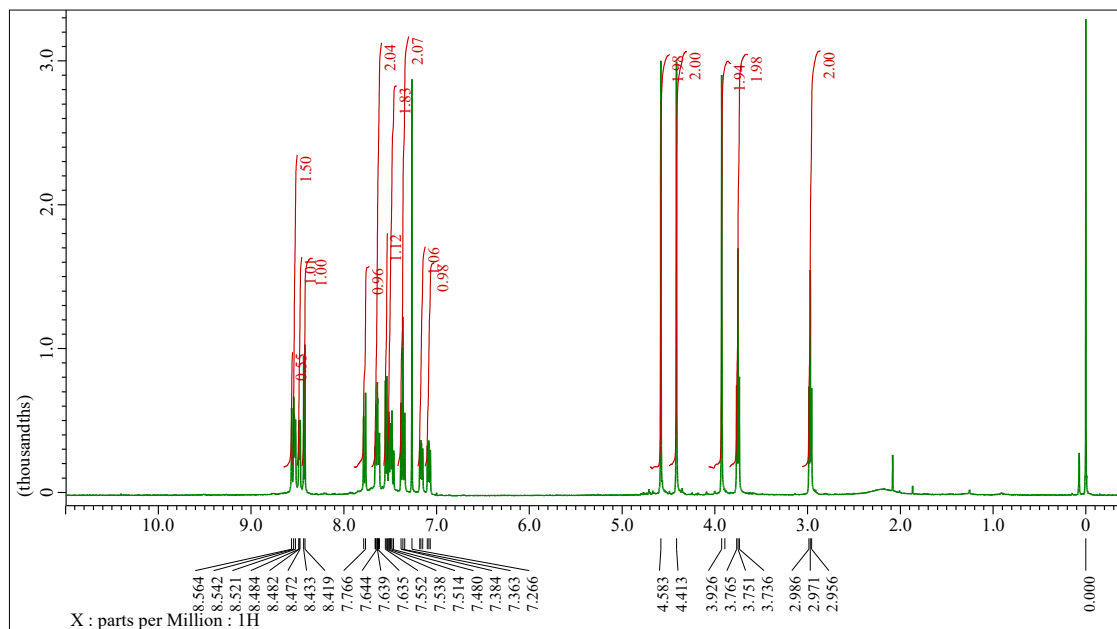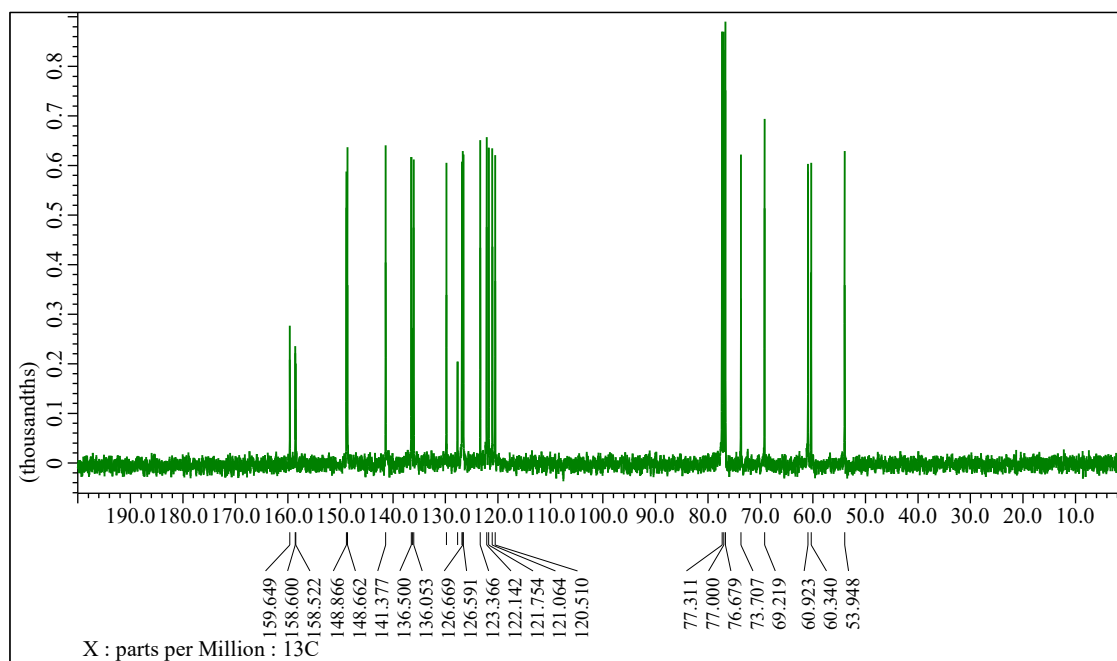

Fig. S9.  $^1\text{H}/^{13}\text{C}$  NMR spectrum of PIP in  $\text{CDCl}_3$ .

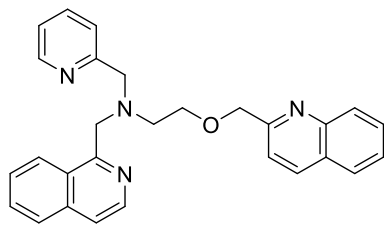

PIQ

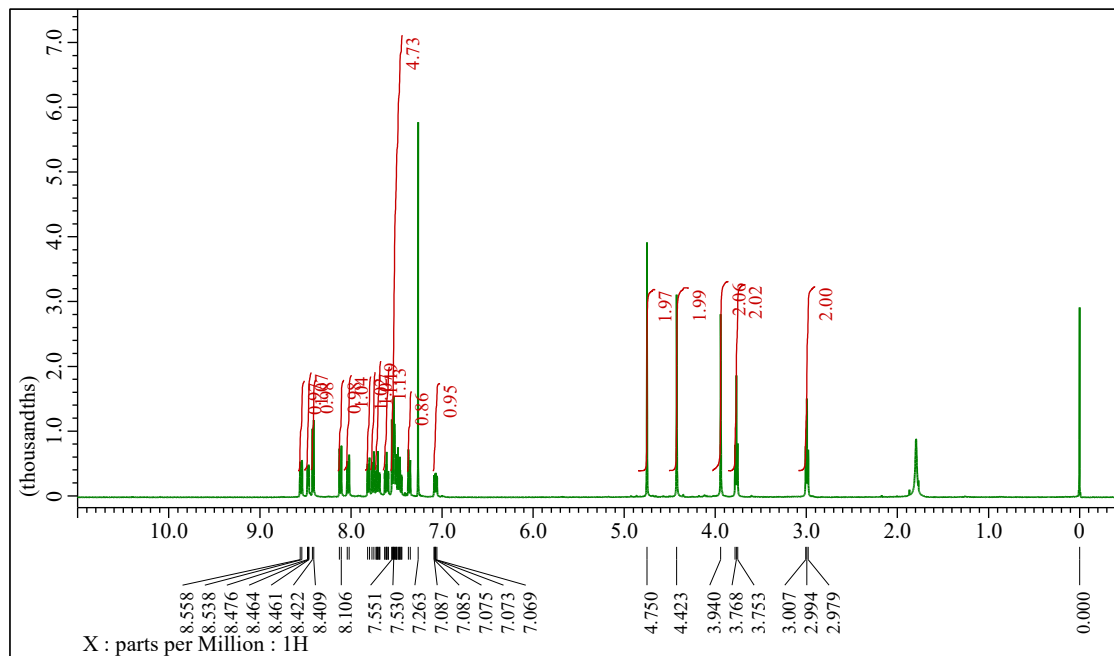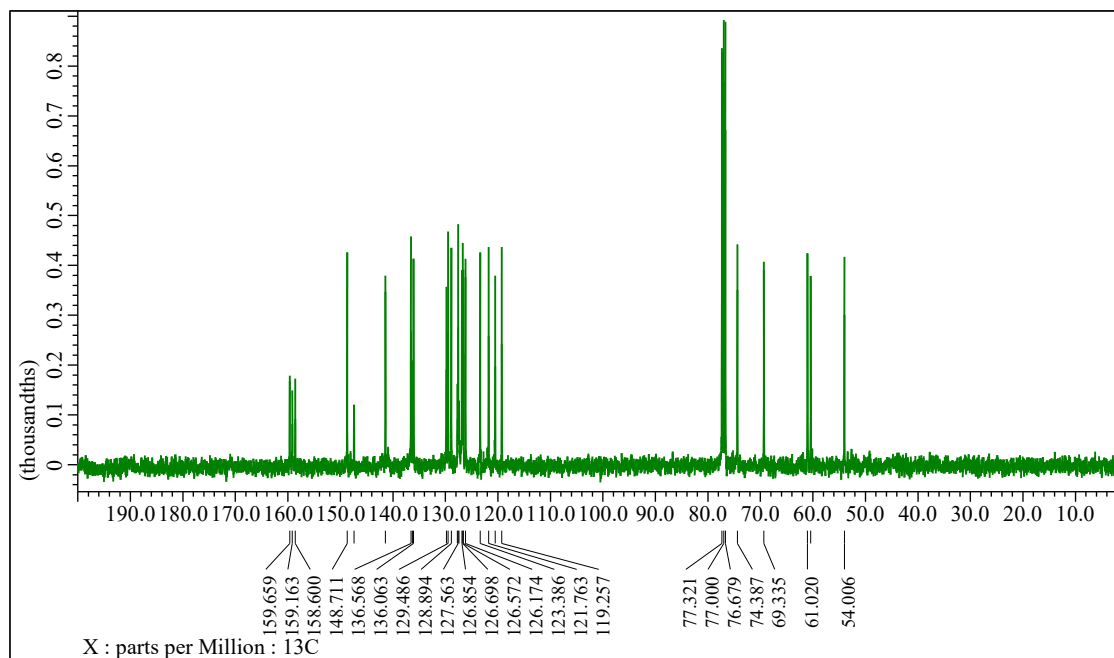Fig. S10.  $^1\text{H}/^{13}\text{C}$  NMR spectrum of PIQ in  $\text{CDCl}_3$ .



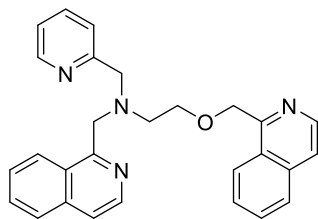

PII

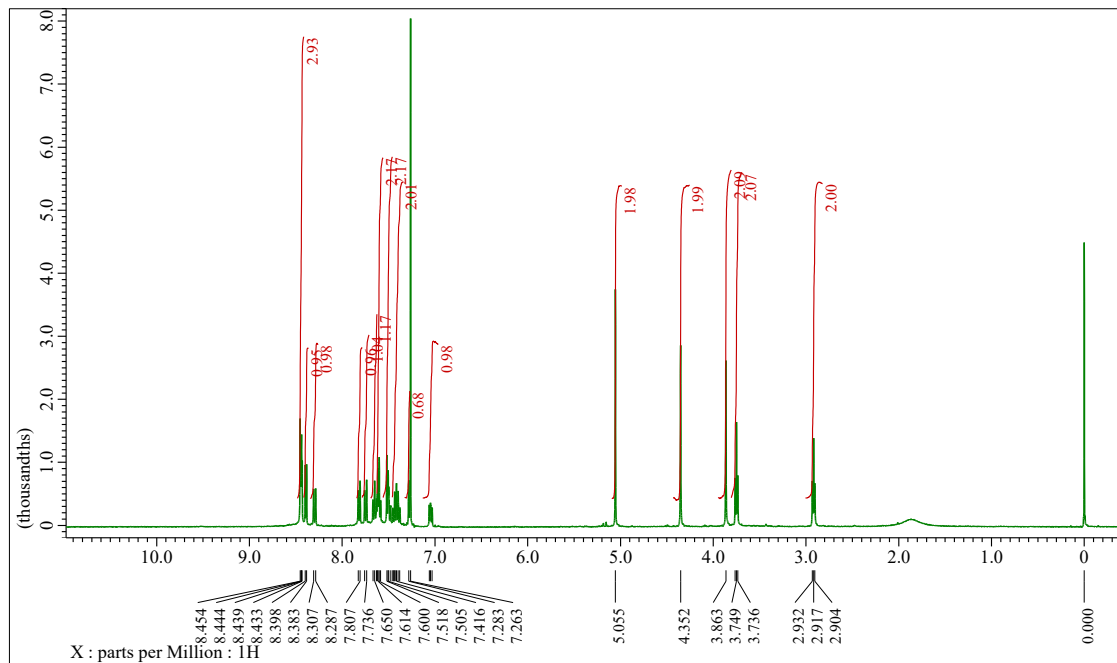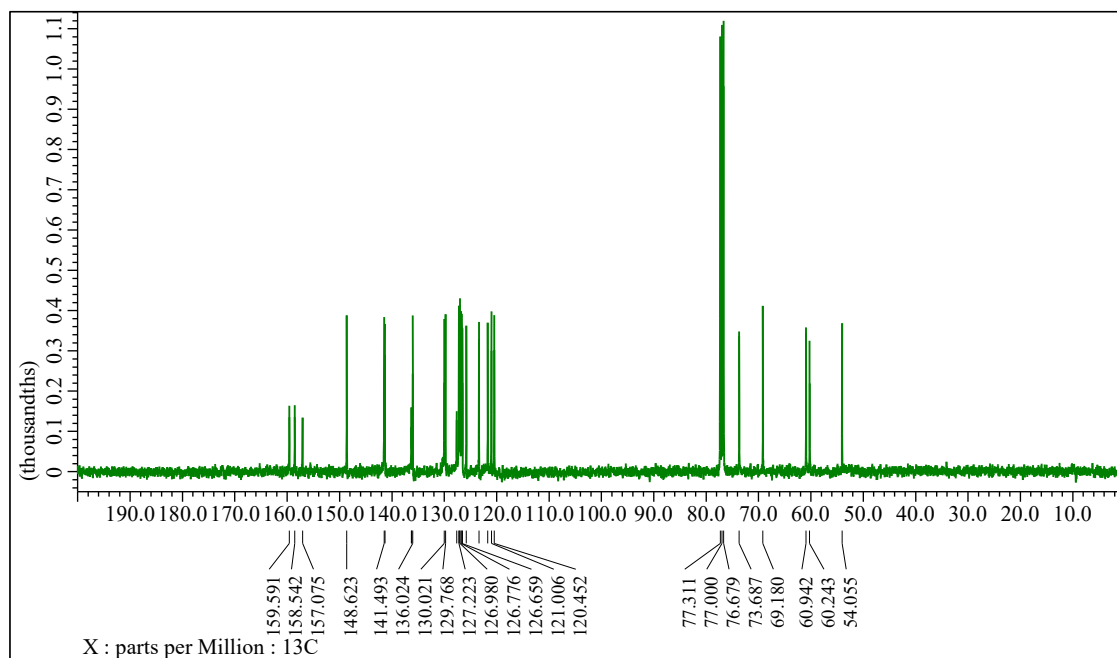Fig. S11.  $^1\text{H}/^{13}\text{C}$  NMR spectrum of PII in  $\text{CDCl}_3$ .

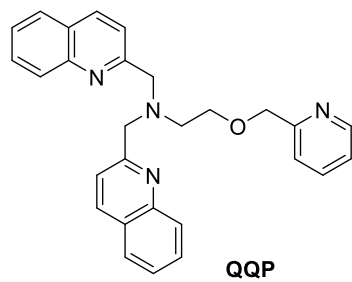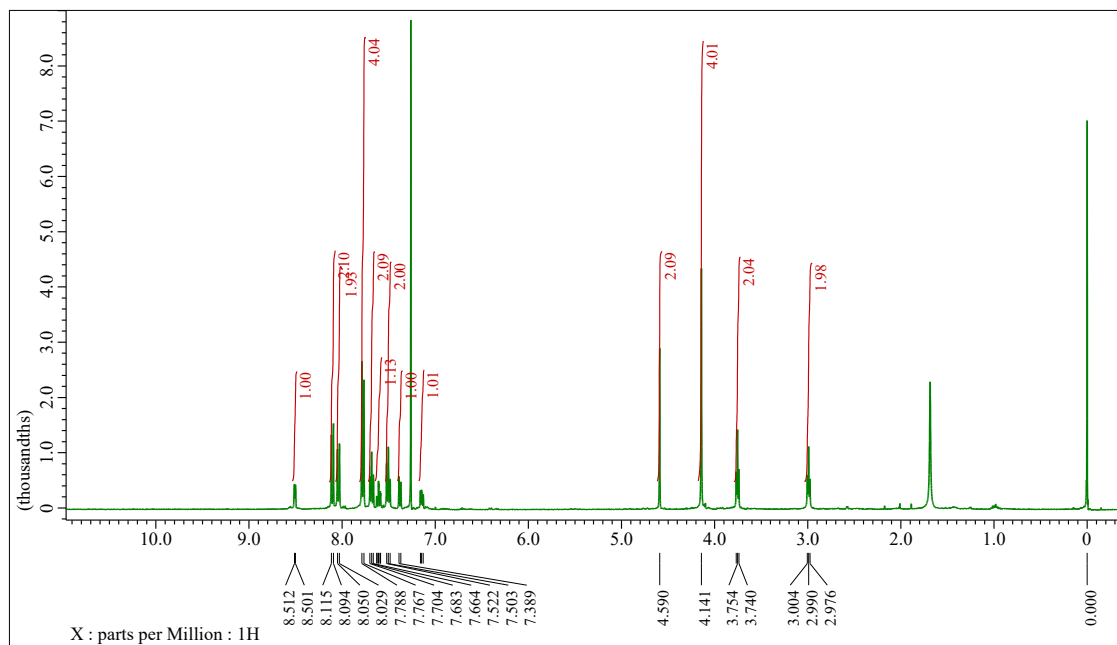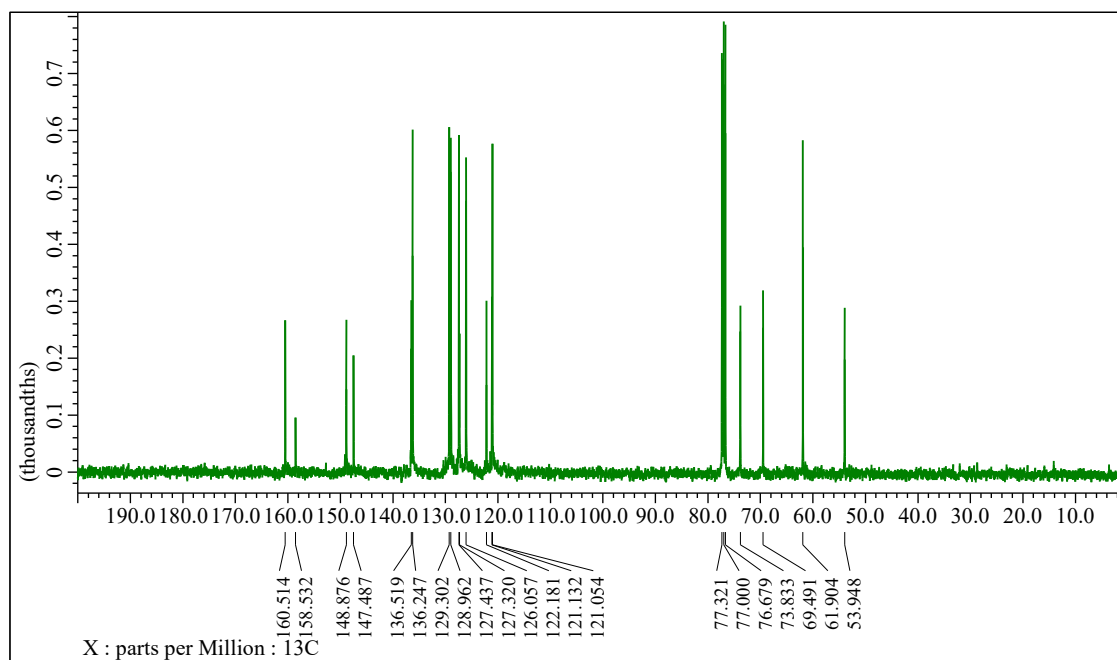

Fig. S12.  $^1\text{H}/^{13}\text{C}$  NMR spectrum of QQP in  $\text{CDCl}_3$ .

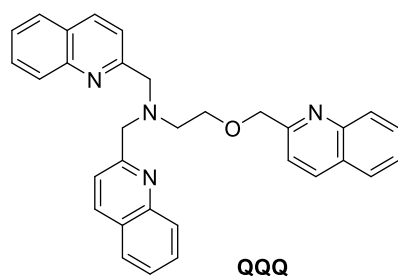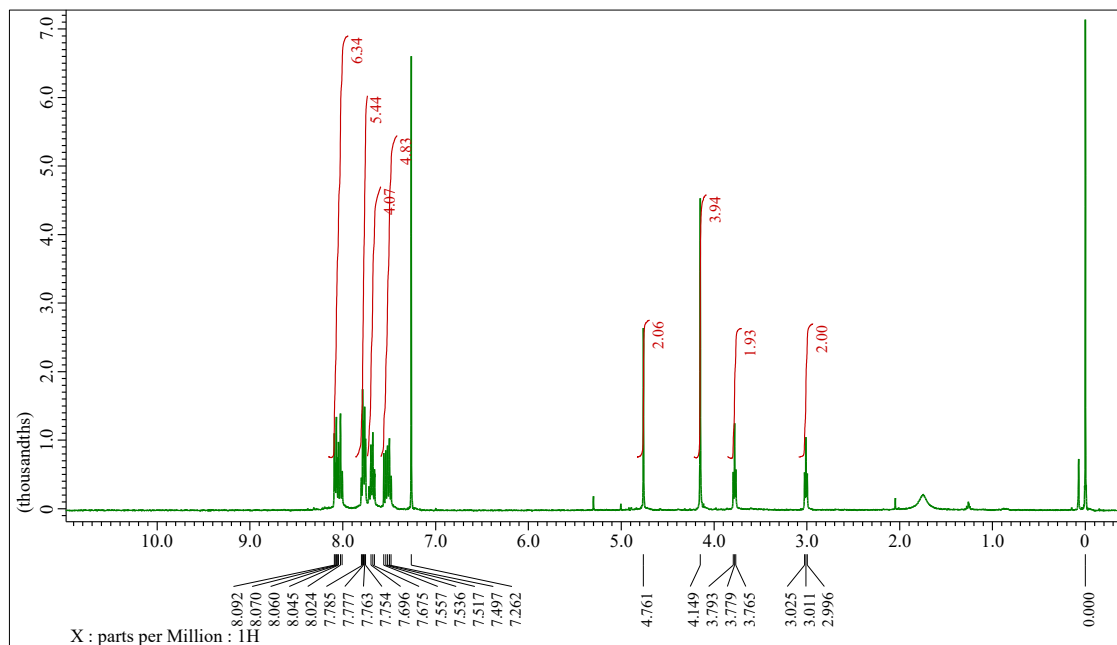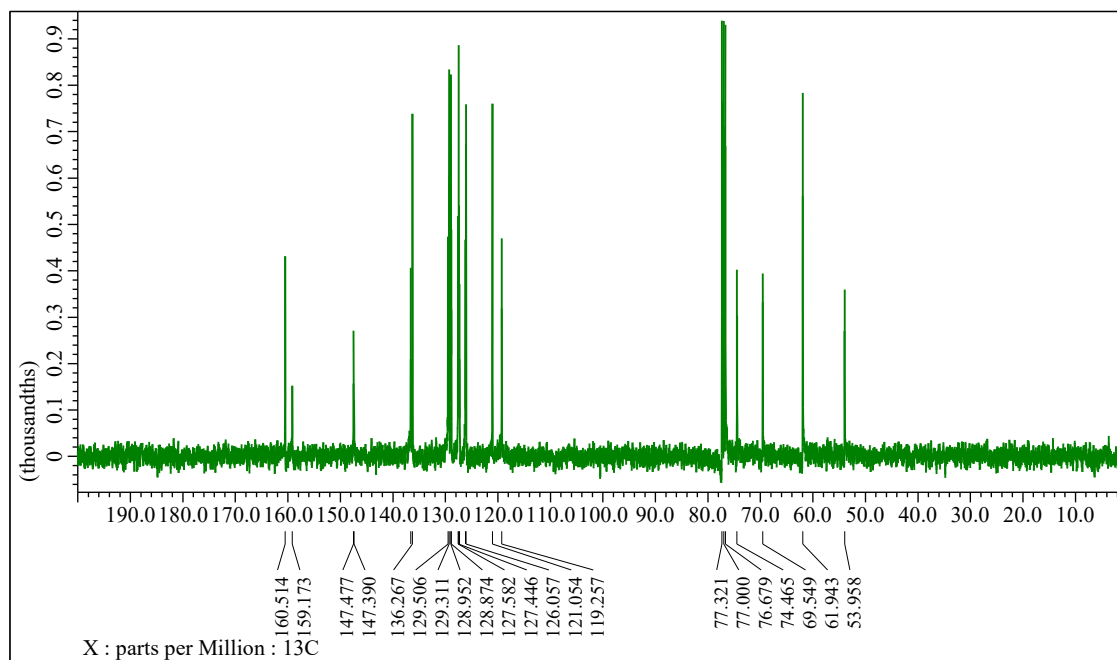

Fig. S13.  $^1\text{H}/^{13}\text{C}$  NMR spectrum of QQQ in  $\text{CDCl}_3$ .

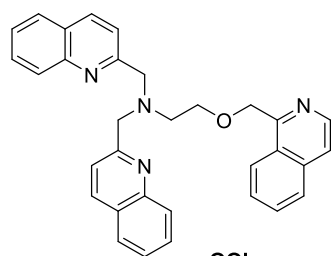

QQI

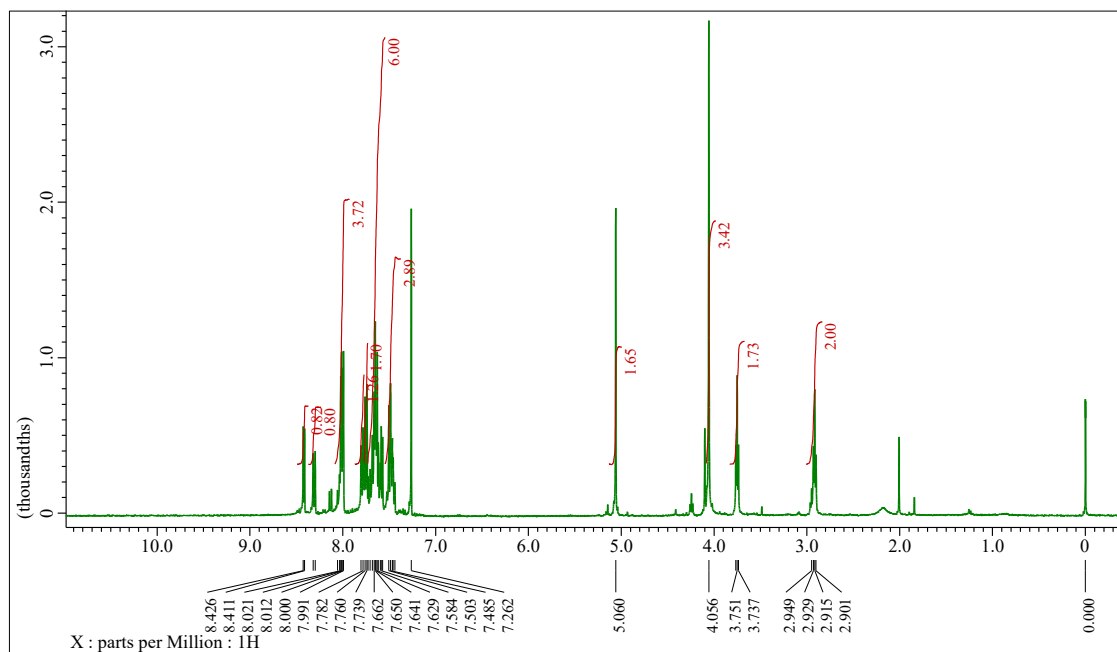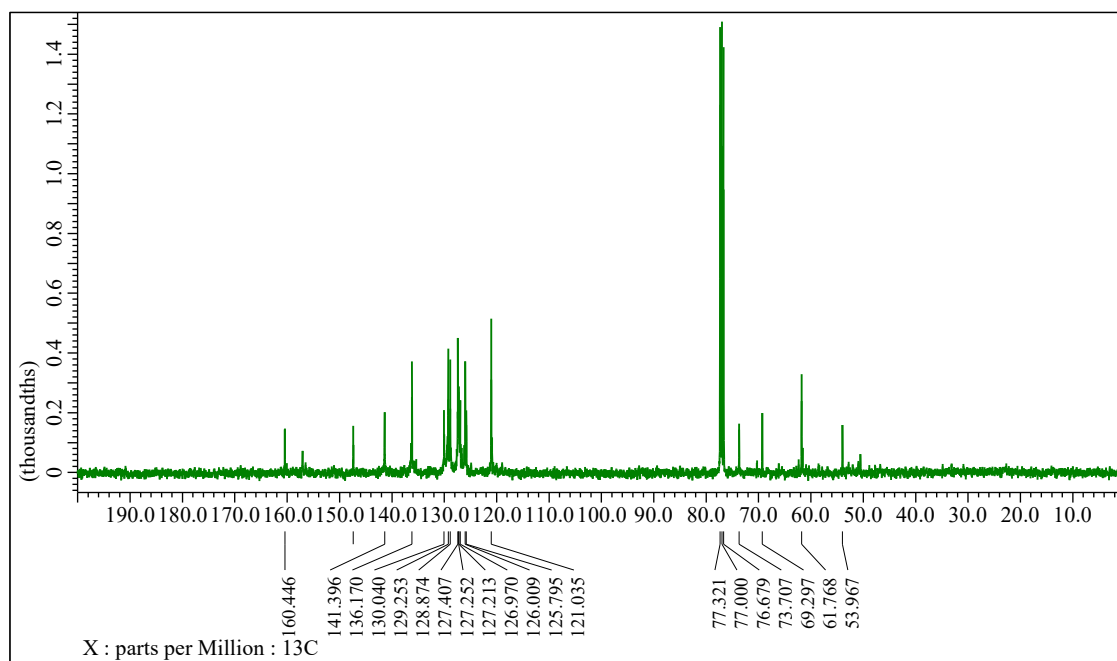**Fig. S14.**  $^1\text{H}/^{13}\text{C}$  NMR spectrum of QQI in  $\text{CDCl}_3$ .

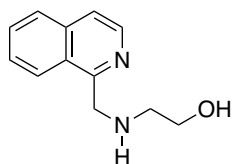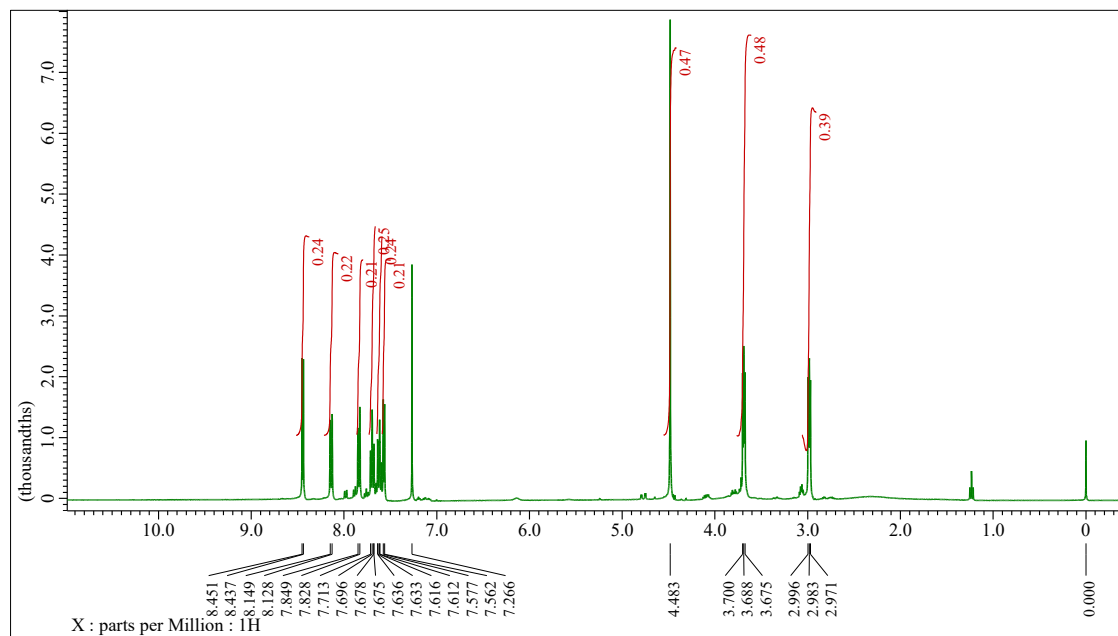

**Fig. S15.**  $^1\text{H}$  NMR spectrum of 2-((1-isoquinolylmethyl)amino)ethanol in  $\text{CDCl}_3$ .

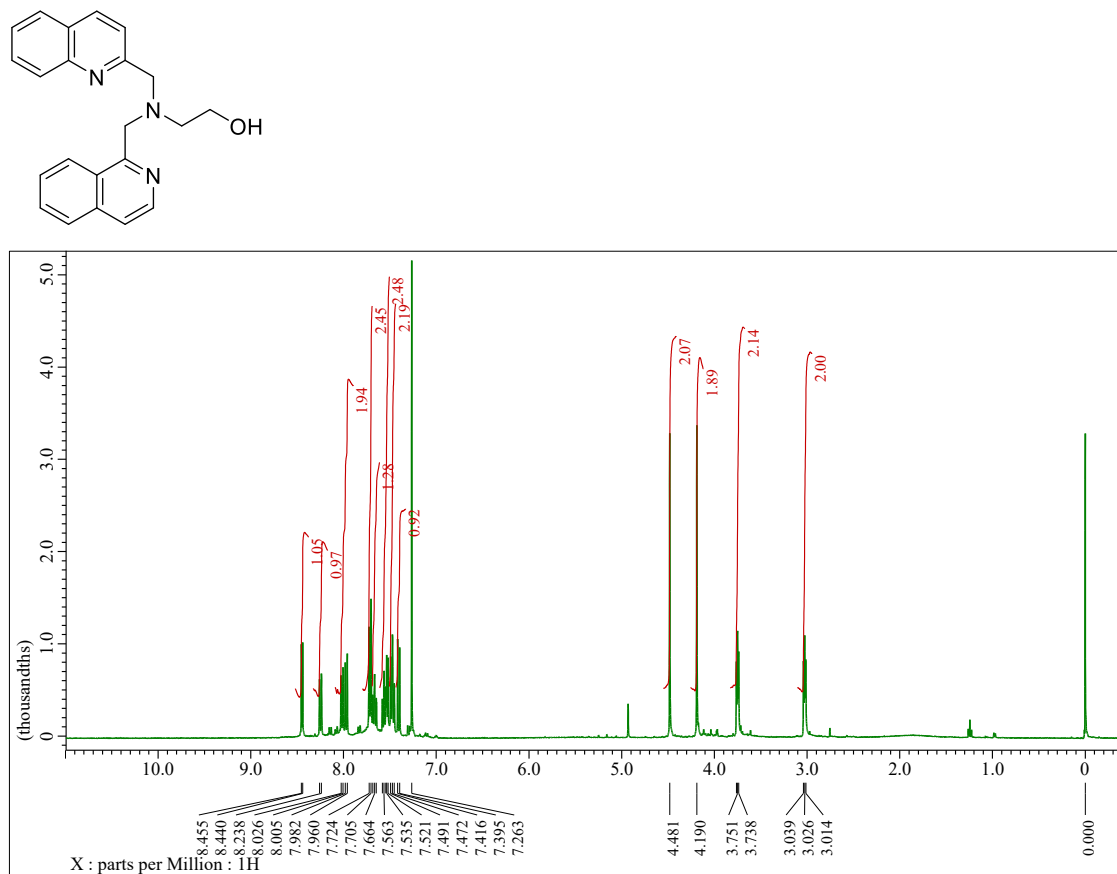

**Fig. S16.** <sup>1</sup>H NMR spectrum of 2-((2-quinolylmethyl)(1-isoquinolylmethyl)-amino)ethanol in CDCl<sub>3</sub>.

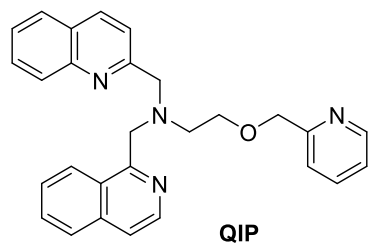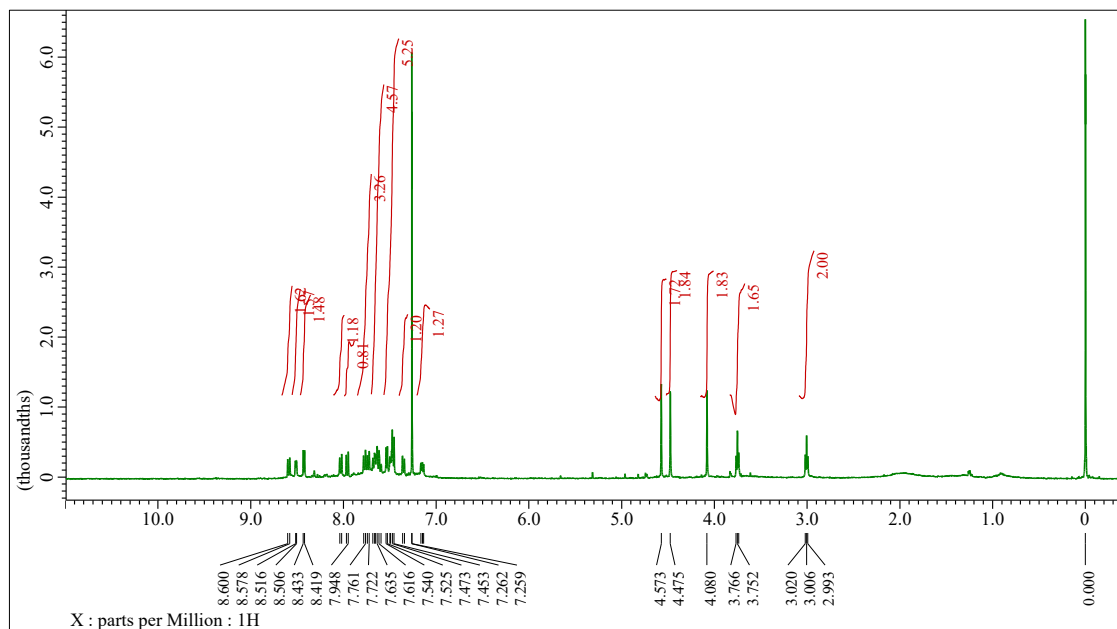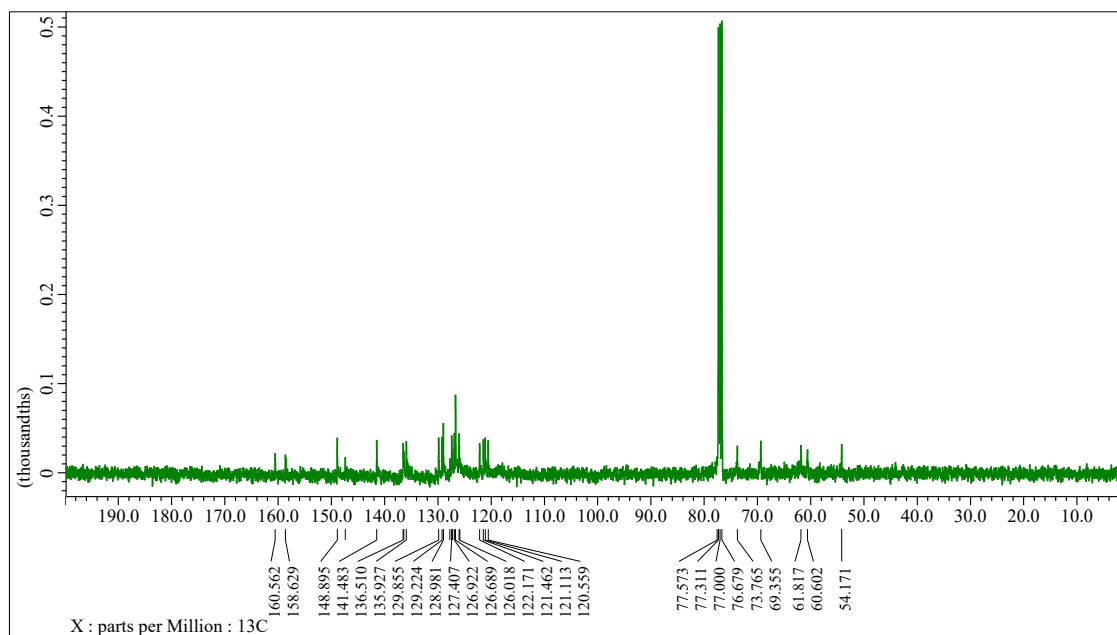

**Fig. S17.**  $^1\text{H}/^{13}\text{C}$  NMR spectrum of QIP in  $\text{CDCl}_3$ .

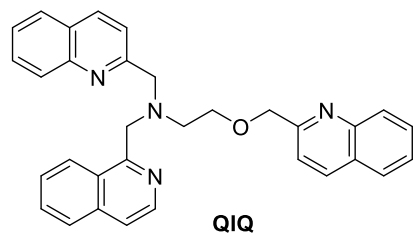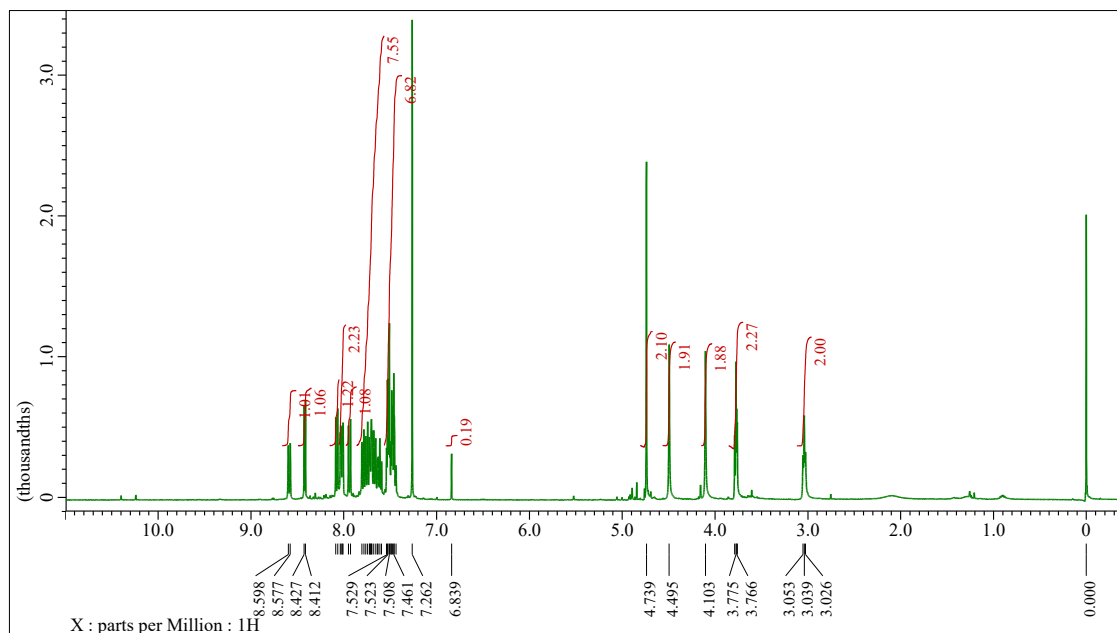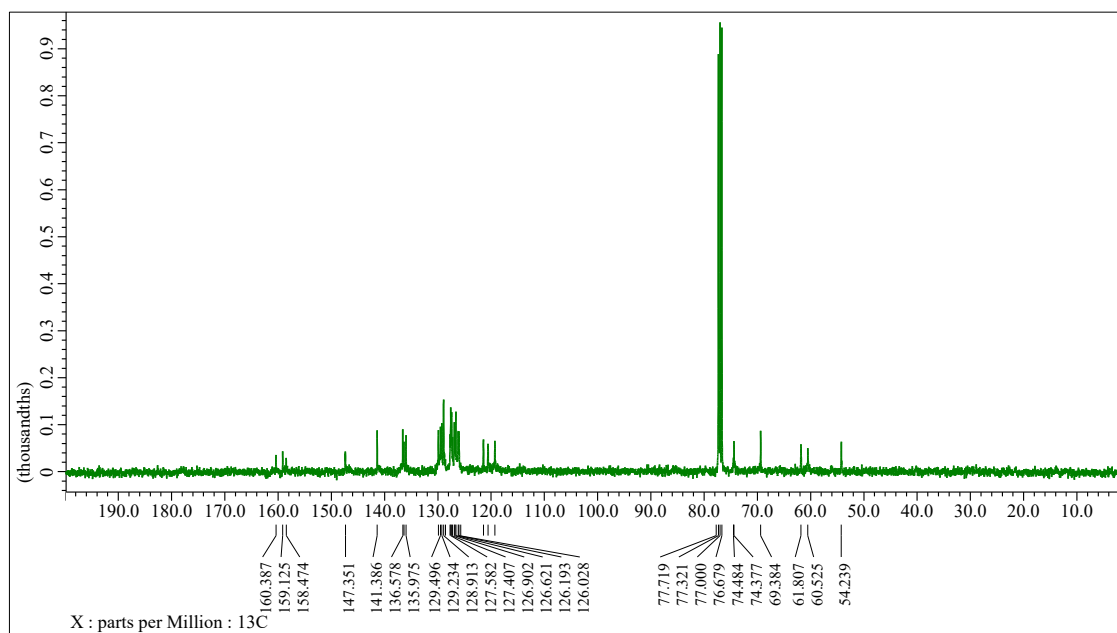

Fig. S18.  $^1\text{H}/^{13}\text{C}$  NMR spectrum of QIQ in  $\text{CDCl}_3$ .



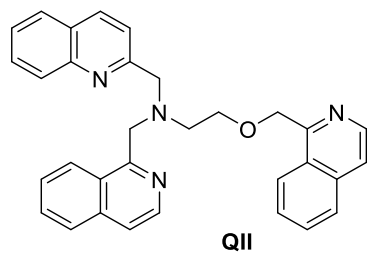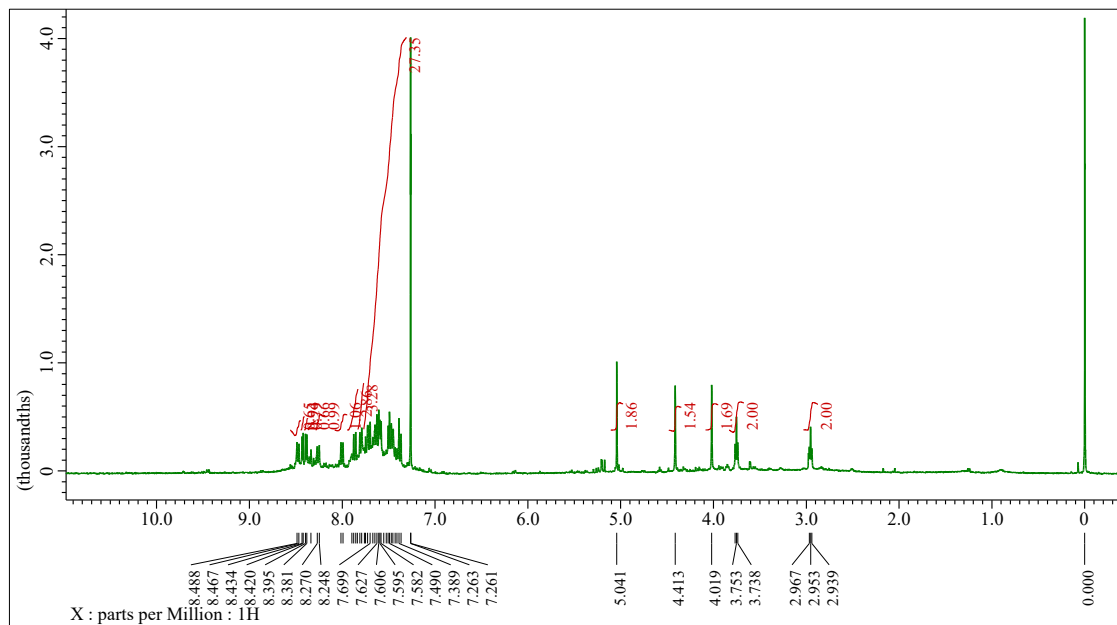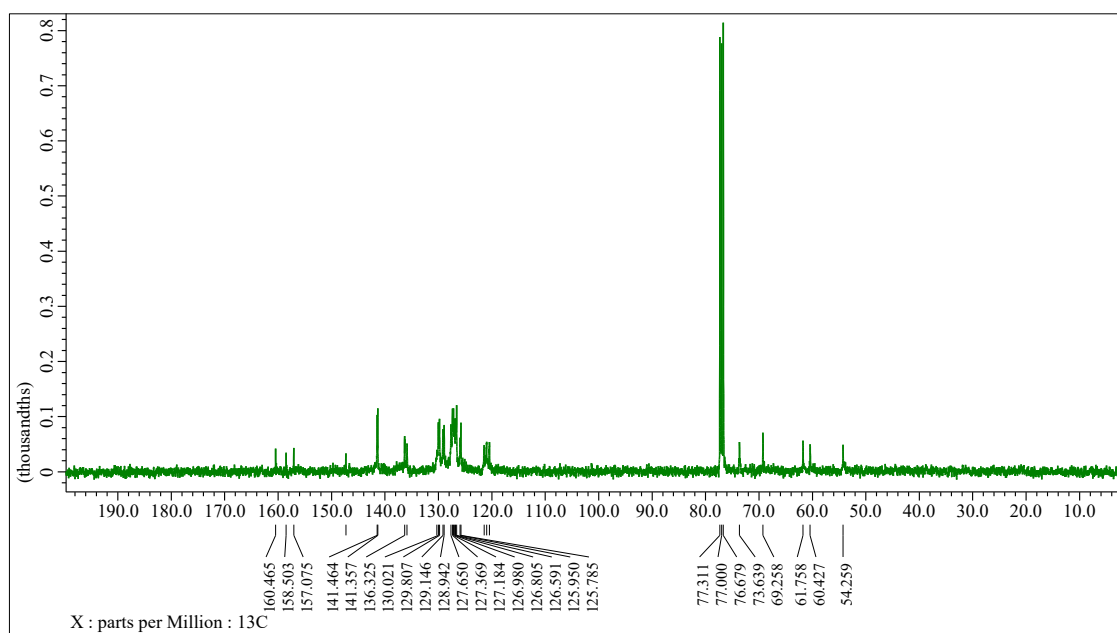

Fig. S19.  $^1\text{H}/^{13}\text{C}$  NMR spectrum of QII in  $\text{CDCl}_3$ .

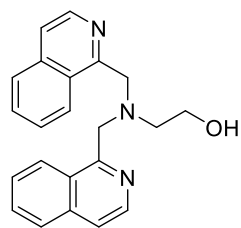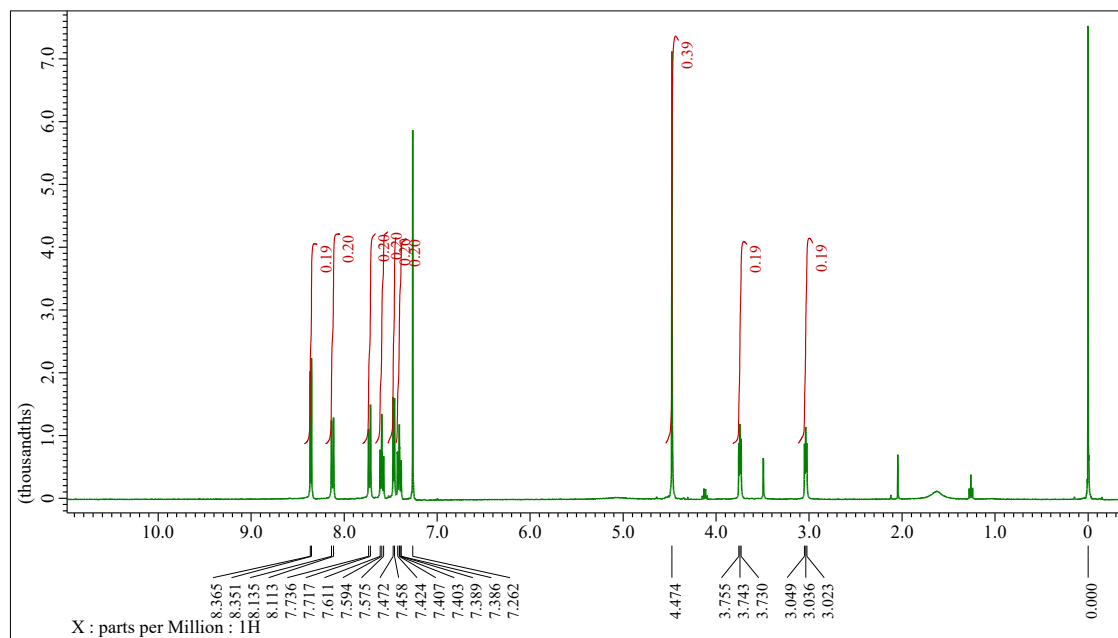

**Fig. S20.**  $^1\text{H}$  NMR spectrum of 2-(bis(1-isoquinolylmethyl)amino)ethanol in  $\text{CDCl}_3$ .

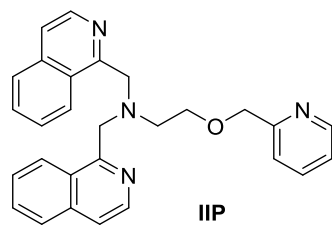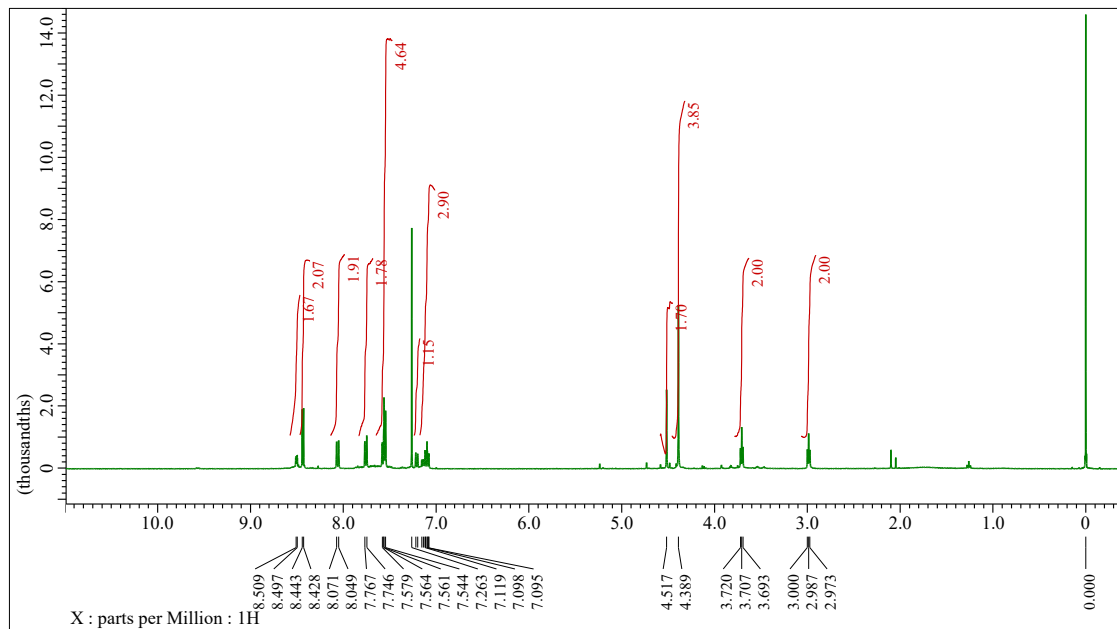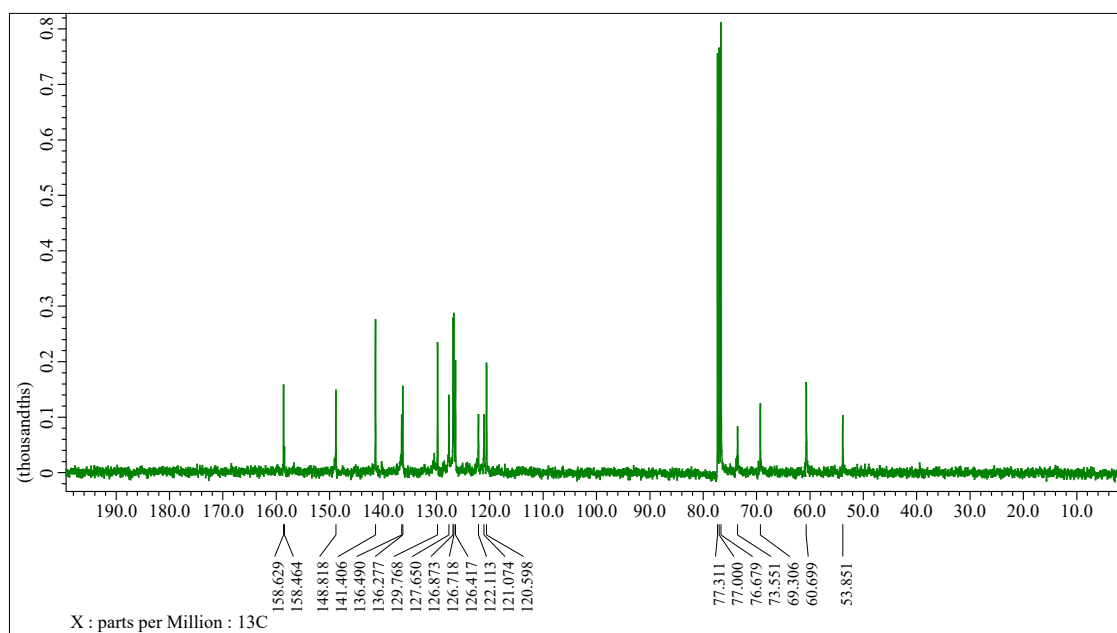

Fig. S21.  $^1\text{H}/^{13}\text{C}$  NMR spectrum of IIP in  $\text{CDCl}_3$ .

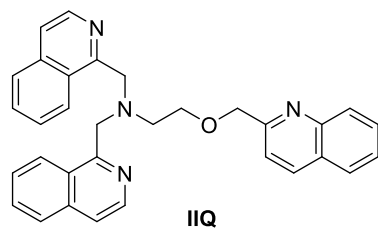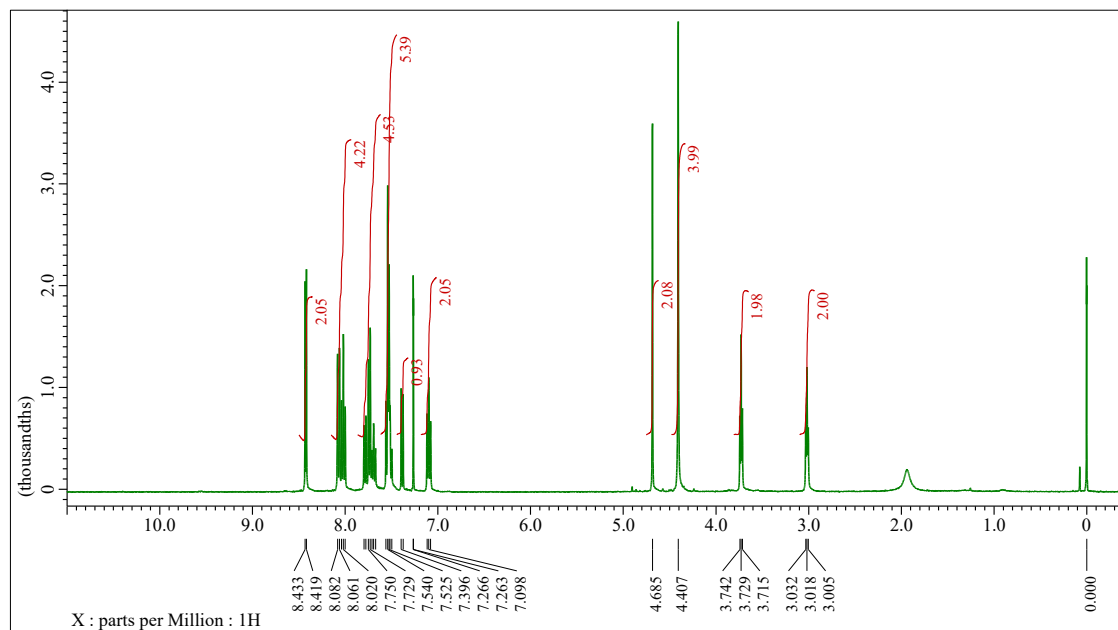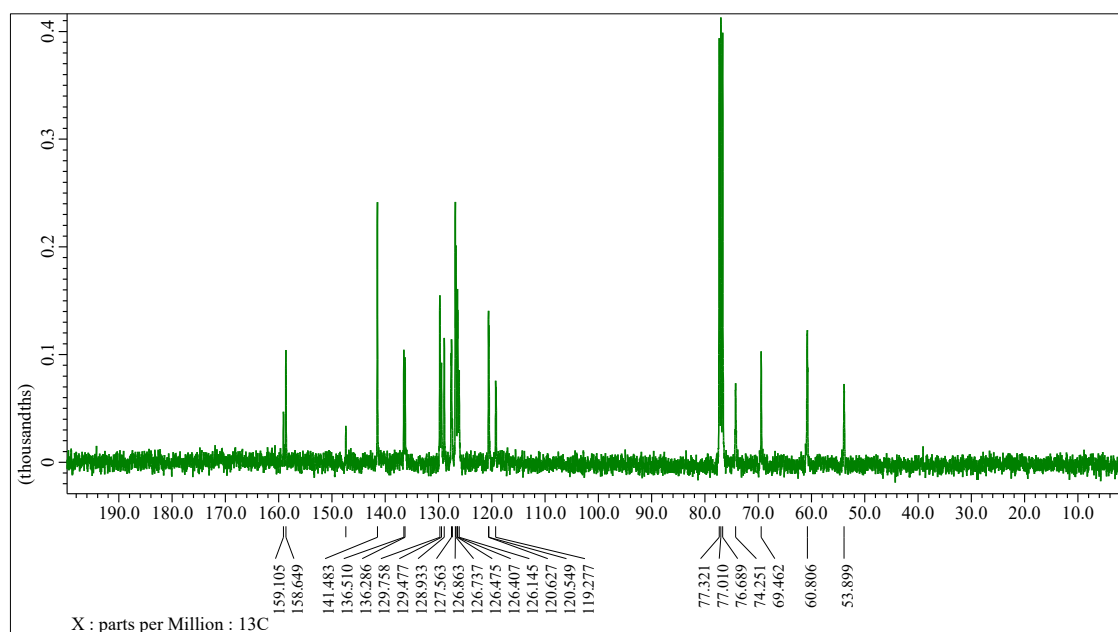

Fig. S22.  $^1\text{H}/^{13}\text{C}$  NMR spectrum of IIQ in  $\text{CDCl}_3$ .

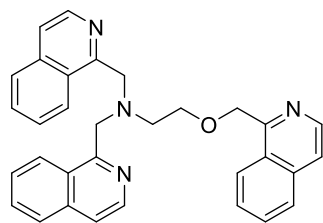

III

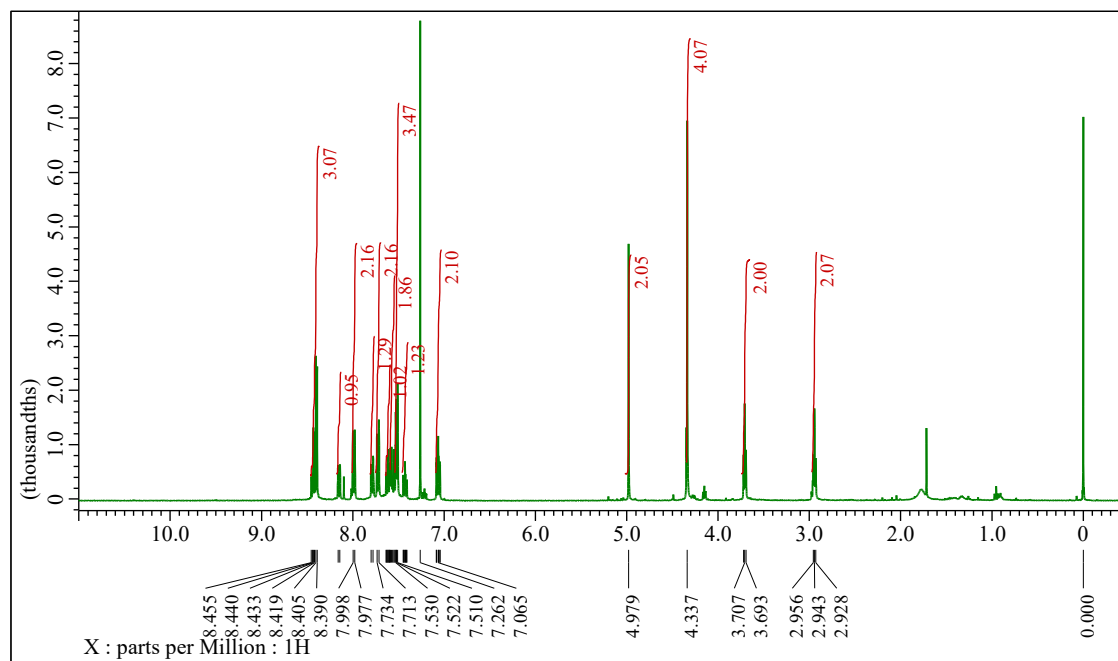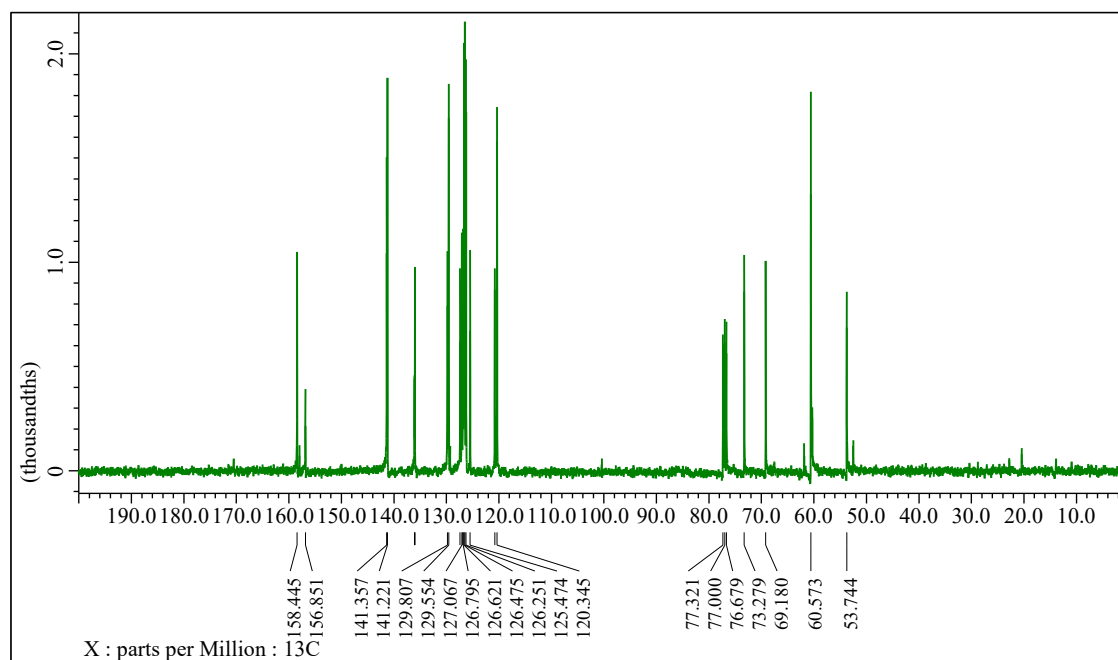

Fig. S23.  $^1\text{H}/^{13}\text{C}$  NMR spectrum of III in  $\text{CDCl}_3$ .

*References*

- S1. Y. Mikata, T. Fujimoto, N. Imai and S. Kondo, *Eur. J. Inorg. Chem.* 4310-4317 (2012).
